# Supplementary material for: Activation of the archaeal ion channel MthK is exquisitely regulated by temperature
Source: eLife. 2020 Dec 4;9:e59055. doi: 10.7554/eLife.59055 (PMC7717905; doi:10.7554/eLife.59055)
Supplement: Figure 1—figure supplement 1—source data 1. [file elife-59055-fig1-figsupp1-data1.xlsx]

## Sheet: Sheet1
37C	no blocker							24C	no blocker
Construct	OD600 (5 times dilution)	Real OD	Average	SD	SEM			Construct	OD600 (2 times dilution)	Real OD	Average	SD	SEM
WT-1	0.237	1.185	1.27125	0.158186	0.0790932			WT-1	0.418	0.836	0.948	0.097509	0.0562968
WT-2	0.246	1.23						WT-2	0.507	1.014
WT-3	0.301	1.505						WT-3	0.497	0.994
WT-4	0.233	1.165						IR-1	0.426	0.852	1.0465	0.182365	0.0911825
IR-1	0.326	1.63	1.7975	0.356008	0.178004			IR-2	0.465	0.93
IR-2	0.31	1.55						IR-3	0.602	1.204
IR-3	0.465	2.325						IR-4	0.6	1.2
IR-4	0.337	1.685						DeltaC-1		0.425	0.40975	0.0208547	0.0104273
DeltaC -1		0.359	0.316	0.0425088	0.0245425			DeltaC-2		0.43
DeltaC -2		0.274						DeltaC-3		0.396
DeltaC -3		0.315						DeltaC-4		0.388
PQE-1		0.176	0.228333	0.0708825	0.040924			PQE-1		0.334	0.3612	0.0677732	0.0303091
PQE-2		0.2						PQE-2		0.358
PQE-3		0.309						PQE-3		0.34
								PQE-4		0.476
								PQE-5		0.298
37C	with blocker							24C	with blocker
Construct	Real OD	Average	SD	SEM				Construct	Real OD	Average	SD	SEM
WT-1	0.23	0.40275	0.153713	0.0768563				WT-1	0.521	0.53775	0.0286749	0.0143375
WT-2	0.355							WT-2	0.507
WT-3	0.428							WT-3	0.569
WT-4	0.598							WT-4	0.554
IR-1	0.328	0.39075	0.0528859	0.0264429				IR-1	0.548	0.5955	0.0505338	0.0252669
IR-2	0.374							IR-2	0.621
IR-3	0.408							IR-3	0.559
IR-4	0.453							IR-4	0.654
DeltaC -1	0.34	0.355667	0.0146401	0.00845248				DeltaC-1	0.577	0.48225	0.0743432	0.0371716
DeltaC -2	0.369							DeltaC-2	0.426
DeltaC -3	0.358							DeltaC-3	0.506
PQE-1	0.291	0.253	0.0445309	0.0257099				DeltaC-4	0.42
PQE-2	0.264							pQE	0.263	0.3172	0.0602802	0.0269581
PQE-3	0.204								0.27
									0.35
									0.406
									0.297
37C (no blocker) versus 37C (blocker)							24C (no blocker) versus 24C (blocker)							37C (blocker) versus 24C (blocker)
Null Hypothesis	Mean1-Mean2 =0						Null Hypothesis	Mean1-Mean2 =0						Null Hypothesis	Mean1-Mean2 =0
Probability > t	MthK FL	MthK IR	MthK DeltaC	Empty vector			Probability > t	MthK FL	MthK IR	MthK DeltaC	Empty vector			Probability > t	MthK FL	MthK IR	MthK DeltaC	Empty vector
Equal variance assumed	0.000222006	0.000231269	0.2012	0.63666			Equal variance assumed	0.000440293	0.00311	0.10947	0.42163			Equal variance assumed	0.13496	0.00311	0.03618	0.16448
Non equal variance assumed	0.000222914	0.00373	0.24264	0.6414			Non equal variance assumed	0.01388	0.01261	0.14445	0.42404			Non equal variance assumed	0.17669	0.01261	0.03904	0.14013
