# Supplementary material for: Activation of the archaeal ion channel MthK is exquisitely regulated by temperature
Source: eLife. 2020 Dec 4;9:e59055. doi: 10.7554/eLife.59055 (PMC7717905; doi:10.7554/eLife.59055)
Supplement: Figure 1—figure supplement 2—source data 1. [file elife-59055-fig1-figsupp2-data1.xlsx]

## Sheet: Sheet1
1.5 mM Ca
Temperature	03_17	03_17_02	2017 03 20	20170321	Average	SEM
18	0.164321	0.170758	0.0831829	0.106676	0.131235	0.0215424
23	0.199114	0.227173	0.135781	0.263615	0.206421	0.0269957
28.5	0.311702	0.355998	0.265488	0.511315	0.361126	0.0533639
35	0.451264	0.551302	0.665372	0.75947	0.606852	0.0670883
42.5	1	1	1	1	1	0
0.3 mM Ba							Temperature	Fitted	SEM
Temperature	20170317	20170315	20170321	Average	SEM		18	0.109	0.0151736
22	0.146729	0.170772	0.1649	0.160801	0.00723702		23	0.169	0.0151736
23.5	0.173312	0.190403	0.173423	0.179046	0.00567844		28.5	0.235	0.0151736
29	0.224474	0.257724	0.212049	0.231416	0.0136345		35	0.313	0.0151736
38	0.421562	0.333596	0.309103	0.354754	0.0341443		42.5	0.403	0.0151736
Temperature	Baseline subtracted	SEM
18	0.0222345	0.0263498
23	0.0374207	0.0309678
28.5	0.126126	0.0554792
35	0.293852	0.0687829
42.5	0.597	0.0151736
