# Supplementary material for: Activation of the archaeal ion channel MthK is exquisitely regulated by temperature
Source: eLife. 2020 Dec 4;9:e59055. doi: 10.7554/eLife.59055 (PMC7717905; doi:10.7554/eLife.59055)
Supplement: Figure 1—source data 1. [file elife-59055-fig1-data1.xlsx]

## Sheet: Sheet1
37C	no blocker							24C	no blocker
Construct	OD600 (5 times dilution)	Real OD	Average	SD	SEM			Construct	OD600 (2 times dilution)	Real OD	Average	SD	SEM
WT-1	0.237	1.185	1.27125	0.158186	0.0790932			WT-1	0.418	0.836	0.948	0.097509	0.0562968
WT-2	0.246	1.23						WT-2	0.507	1.014
WT-3	0.301	1.505						WT-3	0.497	0.994
WT-4	0.233	1.165						IR-1	0.426	0.852	1.0465	0.182365	0.0911825
IR-1	0.326	1.63	1.7975	0.356008	0.178004			IR-2	0.465	0.93
IR-2	0.31	1.55						IR-3	0.602	1.204
IR-3	0.465	2.325						IR-4	0.6	1.2
IR-4	0.337	1.685						DeltaC-1		0.425	0.40975	0.0208547	0.0104273
DeltaC -1		0.359	0.316	0.0425088	0.0245425			DeltaC-2		0.43
DeltaC -2		0.274						DeltaC-3		0.396
DeltaC -3		0.315						DeltaC-4		0.388
PQE-1		0.176	0.228333	0.0708825	0.040924			PQE-1		0.334	0.3612	0.0677732	0.0303091
PQE-2		0.2						PQE-2		0.358
PQE-3		0.309						PQE-3		0.34
								PQE-4		0.476
								PQE-5		0.298
37C (no blocker) versus 24C (no blocker)
Null Hypothesis	Mean1-Mean2 =0
Probability > t	MthK FL	MthK IR	MthK DeltaC	Empty vector
Equal variance assumed	0.0273	0.00945	0.01125	0.03836
Non equal variance assumed	0.02132	0.01622	0.04531	0.05707
