# Supplementary material for: Activation of the archaeal ion channel MthK is exquisitely regulated by temperature
Source: eLife. 2020 Dec 4;9:e59055. doi: 10.7554/eLife.59055 (PMC7717905; doi:10.7554/eLife.59055)
Supplement: Figure 2—figure supplement 1—source data 1. [file elife-59055-fig2-figsupp1-data1.xlsx]

## Sheet: SEC profile
Gel filtration
Volume (ml)	UV
8.99526	161.716
9.01925	161.686
9.04324	161.91
9.06723	162.305
9.09121	162.888
9.1152	163.696
9.13919	164.639
9.16318	165.765
9.18716	167.043
9.21115	168.431
9.23514	169.935
9.25912	171.568
9.28311	173.246
9.3071	174.963
9.33109	176.702
9.35507	178.476
9.37906	180.185
9.40305	181.894
9.42704	183.599
9.45102	185.219
9.47501	186.815
9.499	188.393
9.52299	189.973
9.54697	191.606
9.57096	193.29
9.59495	195.088
9.61894	197.067
9.64292	199.269
9.66691	201.702
9.6909	204.431
9.71488	207.543
9.73887	211.045
9.76286	214.904
9.78685	219.205
9.81083	224.002
9.83482	229.162
9.85881	234.827
9.8828	241.009
9.90678	247.693
9.93077	254.928
9.95476	262.833
9.97875	271.39
10.0027	281.277
10.0267	291.946
10.0507	303.726
10.0747	317.139
10.0987	332.123
10.1227	348.67
10.1467	367.084
10.1706	387.477
10.1946	409.868
10.2186	433.876
10.2426	459.29
10.2666	486.078
10.2906	514.351
10.3146	543.271
10.3386	572.636
10.3625	603.078
10.3865	632.948
10.4105	662.168
10.4345	690.319
10.4585	717.548
10.4825	741.687
10.5065	763.175
10.5305	781.312
10.5544	795.452
10.5784	805.138
10.6024	809.597
10.6264	808.874
10.6504	802.575
10.6744	790.915
10.6984	774.26
10.7224	752.482
10.7463	726.664
10.7703	697.117
10.7943	665.658
10.8183	632.834
10.8423	598.958
10.8663	565.928
10.8903	534.566
10.9142	504.543
10.9382	477.278
10.9622	453.641
10.9862	432.725
11.0102	415.103
11.0342	399.918
11.0582	387.249
11.0822	376.821
11.1061	368.035
11.1301	360.148
11.1541	353.303
11.1781	346.943
11.2021	340.616
11.2261	334.066
11.2501	327.486
11.2741	320.464
11.298	313.001
11.322	305.149
11.346	296.808
11.37	288.166
11.394	279.232
11.418	270.037
11.442	260.738
11.466	251.411
11.49	241.903
11.5139	232.708
11.5379	223.654
11.5619	214.945
11.5859	206.421
11.6099	198.142
11.6339	190.353
11.6579	182.951
11.6819	175.791
11.7058	169.135
11.7298	162.904
11.7538	156.963
11.7778	151.564
11.8018	146.354
11.8258	141.543
11.8498	137.104
11.8737	132.967
11.8977	129.068
11.9217	125.556
11.9457	122.268
11.9697	119.157
11.9937	116.352
