# Supplementary material for: Activation of the archaeal ion channel MthK is exquisitely regulated by temperature
Source: eLife. 2020 Dec 4;9:e59055. doi: 10.7554/eLife.59055 (PMC7717905; doi:10.7554/eLife.59055)
Supplement: Figure 2—figure supplement 2—source data 1. [file elife-59055-fig2-figsupp2-data1.xlsx]

## Sheet: Sheet1
x	y		Fitted line			Fitted statistic
Bin center	sqrt(count)		x	y		file name	fit function	Best number	P1	S.E.	tau1	s.e.	P2	S.E.	tau2	s.e.	P3	S.E.	tau3	s.e.	Intercept	correlation	standard deviation	sum of the squared error
-0.9	11.4017		-0.9	8.44953		Results1	Exponential, log probability, 3rd Order	3	36.1244	4.03439	0.602237	0.13479	59.9888	10.975	3.8681	0.194225	42.9855	12.6708	12.382	0.197848	26.5776	0.891521	2.47196	250.533
-0.83333	11.7047		-0.87239	8.91055
-0.76667	0		-0.84478	9.39058
-0.7	13		-0.81717	9.88961
-0.63333	13.8203		-0.78956	10.4075
-0.56667	16.8819		-0.76195	10.9441
-0.5	17.1464		-0.73434	11.4988
-0.43333	23.9583		-0.70673	12.0713
-0.36667	16.6733		-0.67912	12.6606
-0.3	23.1517		-0.65152	13.2659
-0.23333	26.9073		-0.62391	13.886
-0.16667	20.7605		-0.5963	14.5196
-0.1	28.2843		-0.56869	15.165
-0.03333	23.3452		-0.54108	15.8204
0.03333	24.1247		-0.51347	16.4836
0.1	26.8887		-0.48586	17.1524
0.16667	27.7849		-0.45825	17.8242
0.23333	28.8964		-0.43064	18.496
0.3	29.1376		-0.40303	19.165
0.36667	30.348		-0.37542	19.8277
0.43333	31.5119		-0.34781	20.4809
0.5	31.289		-0.3202	21.121
0.56667	32.9393		-0.29259	21.7445
0.63333	32.5576		-0.26498	22.3479
0.7	33.0303		-0.23737	22.9276
0.76667	31.5119		-0.20976	23.4804
0.83333	30.1496		-0.18216	24.0033
0.9	28.1425		-0.15455	24.4938
0.96667	28.3725		-0.12694	24.9496
1.03333	26.7769		-0.09933	25.3694
1.1	24.3926		-0.07172	25.7523
1.16667	21.4243		-0.04411	26.0984
1.23333	18.735		-0.0165	26.4086
1.3	16.0624		0.01111	26.6849
1.36667	13.8924		0.03872	26.9301
1.43333	10.198		0.06633	27.1482
1.5	7.61577		0.09394	27.344
1.56667	6.16441		0.12155	27.5231
1.63333	4.12311		0.14916	27.6919
1.7	2.82843		0.17677	27.8571
1.76667	2.82843		0.20438	28.0256
1.83333	1		0.23199	28.2044
			0.2596	28.3997
			0.28721	28.617
			0.31481	28.8605
			0.34242	29.1329
			0.37003	29.4348
			0.39764	29.765
			0.42525	30.1199
			0.45286	30.4937
			0.48047	30.8783
			0.50808	31.264
			0.53569	31.6392
			0.5633	31.9915
			0.59091	32.3076
			0.61852	32.5743
			0.64613	32.7788
			0.67374	32.9093
			0.70135	32.9553
			0.72896	32.9082
			0.75657	32.7615
			0.78417	32.5108
			0.81178	32.154
			0.83939	31.6916
			0.867	31.1261
			0.89461	30.4626
			0.92222	29.7077
			0.94983	28.8701
			0.97744	27.9601
			1.00505	26.9887
			1.03266	25.9681
			1.06027	24.9102
			1.08788	23.8271
			1.11549	22.7301
			1.1431	21.6292
			1.17071	20.5329
			1.19832	19.448
			1.22593	18.3791
			1.25354	17.329
			1.28114	16.2986
			1.30875	15.2872
			1.33636	14.2934
			1.36397	13.3148
			1.39158	12.3494
			1.41919	11.3959
			1.4468	10.4537
			1.47441	9.52423
			1.50202	8.61013
			1.52963	7.7159
			1.55724	6.84741
			1.58485	6.01162
			1.61246	5.21601
			1.64007	4.4681
			1.66768	3.77479
			1.69529	3.14185
			1.7229	2.57354
			1.75051	2.07222
			1.77812	1.63829
			1.80572	1.27015
			1.83333	0.96442
