# Supplementary material for: Activation of the archaeal ion channel MthK is exquisitely regulated by temperature
Source: eLife. 2020 Dec 4;9:e59055. doi: 10.7554/eLife.59055 (PMC7717905; doi:10.7554/eLife.59055)
Supplement: Figure 2—figure supplement 3—source data 1. [file elife-59055-fig2-figsupp3-data1.xlsx]

## Sheet: Sheet1
	21C	38C	Back to 21C
Patch 1	0.0205	0.042	3.28e-05
Patch 2	0.0074	0.17	0.0435
Patch 3	0.0217	0.146	0.0245
Patch 4	0.0027	0.081	3.6e-05
Patch 5	0.0001	0.178	4.8e-05
Patch 6	0.0009	0.157	0.0001962
Average	0.00888333	0.129	0.0113855
SEM	0.0040022	0.0223815	0.00756035
