# Supplementary material for: Activation of the archaeal ion channel MthK is exquisitely regulated by temperature
Source: eLife. 2020 Dec 4;9:e59055. doi: 10.7554/eLife.59055 (PMC7717905; doi:10.7554/eLife.59055)
Supplement: Figure 2—source data 1. [file elife-59055-fig2-data1.xlsx]

## Sheet: Sheet1
Temperature	open dwell time	SDM	n	Unitary .Conductance	SDM	n	Open probability	SDM	n
21	6.13	1.53	5	170.3	28.5	5	0.007	0.003	5
26	7.74	1.68	4	127.5	32.9	4	0.004	0.002	4
32	8.18	2.11	4	105.4	40.6	4	0.005	0.002	4
37	4.99	1.34	5	173.1	25.4	5	0.101	0.024	5
