# Supplementary material for: Activation of the archaeal ion channel MthK is exquisitely regulated by temperature
Source: eLife. 2020 Dec 4;9:e59055. doi: 10.7554/eLife.59055 (PMC7717905; doi:10.7554/eLife.59055)
Supplement: Figure 3—figure supplement 1—source data 1. [file elife-59055-fig3-figsupp1-data1.xlsx]

## Sheet: Sheet1
MthK IR		MthK Pore
Volume (ml)	Normalized UV	Volume (ml)	Normalized UV
8.99526	19.9749	9.00456	0.51245
9.01925	19.9712	9.03051	0.51686
9.04324	19.9988	9.05646	0.52756
9.06723	20.0476	9.08241	0.54078
9.09121	20.1196	9.10836	0.56093
9.1152	20.2194	9.13431	0.58485
9.13919	20.3359	9.16026	0.61255
9.16318	20.475	9.18621	0.6541
9.18716	20.6329	9.21216	0.69502
9.21115	20.8043	9.23811	0.73846
9.23514	20.9901	9.26406	0.79701
9.25912	21.1918	9.29	0.85052
9.28311	21.399	9.31595	0.91977
9.3071	21.6111	9.3419	0.98902
9.33109	21.8259	9.36785	1.0696
9.35507	22.045	9.3938	1.15774
9.37906	22.2561	9.41975	1.2421
9.40305	22.4672	9.4457	1.33653
9.42704	22.6778	9.47165	1.44544
9.45102	22.8779	9.4976	1.56758
9.47501	23.0751	9.52355	1.69789
9.499	23.27	9.5495	1.84772
9.52299	23.4651	9.57545	2.01833
9.54697	23.6668	9.6014	2.21097
9.57096	23.8748	9.62735	2.4332
9.59495	24.0969	9.6533	2.69699
9.61894	24.3414	9.67925	3.00609
9.64292	24.6134	9.7052	3.38193
9.66691	24.9139	9.73115	3.82765
9.6909	25.251	9.7571	4.36781
9.71488	25.6353	9.78305	5.02254
9.73887	26.0679	9.809	5.79562
9.76286	26.5446	9.83495	6.70217
9.78685	27.0758	9.8609	7.75478
9.81083	27.6683	9.88685	8.96918
9.83482	28.3057	9.9128	10.3454
9.85881	29.0054	9.93875	11.8796
9.8828	29.769	9.9647	13.5592
9.90678	30.5946	9.99065	15.3616
9.93077	31.4883	10.0166	17.2887
9.95476	32.4647	10.0426	19.3152
9.97875	33.5216	10.0685	21.3889
10.0027	34.7428	10.0945	23.4903
10.0267	36.0607	10.1204	25.5691
10.0507	37.5157	10.1463	27.5648
10.0747	39.1724	10.1723	29.5246
10.0987	41.0232	10.1982	31.3301
10.1227	43.0671	10.2242	32.9417
10.1467	45.3416	10.2501	34.3652
10.1706	47.8605	10.2761	35.5456
10.1946	50.6262	10.302	36.5163
10.2186	53.5916	10.328	37.2088
10.2426	56.7307	10.3539	37.6161
10.2666	60.0395	10.3799	37.7717
10.2906	63.5317	10.4058	37.6678
10.3146	67.1039	10.4318	37.3303
10.3386	70.731	10.4577	36.7568
10.3625	74.4911	10.4837	36.0014
10.3865	78.1806	10.5096	35.0772
10.4105	81.7898	10.5356	34.0063
10.4345	85.267	10.5615	32.814
10.4585	88.6303	10.5875	31.5492
10.4825	91.6119	10.6134	30.1938
10.5065	94.266	10.6394	28.8201
10.5305	96.5063	10.6653	27.4294
10.5544	98.2528	10.6913	26.0318
10.5784	99.4492	10.7172	24.6443
10.6024	100	10.7432	23.2725
10.6264	99.9107	10.7691	21.9668
10.6504	99.1326	10.7951	20.704
10.6744	97.6924	10.821	19.4952
10.6984	95.6352	10.847	18.3658
10.7224	92.9453	10.8729	17.2924
10.7463	89.7563	10.8989	16.2921
10.7703	86.1067	10.9248	15.3723
10.7943	82.2209	10.9508	14.535
10.8183	78.1665	10.9767	13.7506
10.8423	73.9822	11.0027	13.0298
10.8663	69.9024	11.0286	12.3851
10.8903	66.0286	11.0546	11.8021
10.9142	62.3203	11.0805	11.2645
10.9382	58.9525	11.1065	10.7697
10.9622	56.0329	11.1324	10.3309
10.9862	53.4494	11.1584	9.9412
11.0102	51.2728	11.1843	9.5918
11.0342	49.3972	11.2103	9.28584
11.0582	47.8323	11.2362	9.01325
11.0822	46.5443	11.2622	8.78346
11.1061	45.459	11.2881	8.59019
11.1301	44.4849	11.3141	8.41832
11.1541	43.6394	11.34	8.27856
11.1781	42.8538	11.366	8.16965
11.2021	42.0723	11.3919	8.08277
11.2261	41.2632	11.4179	8.01478
11.2501	40.4505	11.4438	7.96127
11.2741	39.5832	11.4698	7.92539
11.298	38.6613	11.4957	7.89013
11.322	37.6915	11.5217	7.85802
11.346	36.6612	11.5476	7.83347
11.37	35.5938	11.5736	7.80892
11.394	34.4903	11.5995	7.78563
11.418	33.3545	11.6255	7.7573
11.442	32.2059	11.6514	7.72456
11.466	31.0539	11.6774	7.68993
11.49	29.8794	11.7033	7.65783
11.5139	28.7437	11.7293	7.62887
11.5379	27.6254	11.7552	7.60306
11.5619	26.5496	11.7812	7.58102
11.5859	25.4968	11.8071	7.56465
11.6099	24.4742	11.8331	7.56403
11.6339	23.5121	11.859	7.57284
11.6579	22.5978	11.885	7.59361
11.6819	21.7134	11.9109	7.62698
11.7058	20.8913	11.9369	7.6742
11.7298	20.1216	11.9628	7.72834
11.7538	19.3878	11.9888	7.79381
11.7778	18.7209	12.0147	7.87313
11.8018	18.0774	12.0407	7.95497
11.8258	17.4831	12.0666	8.03808
11.8498	16.9349	12.0926	8.13062
11.8737	16.4239	12.1185	8.22883
11.8977	15.9422	12.1445	8.31948
11.9217	15.5085	12.1704	8.40007
11.9457	15.1023	12.1964	8.47561
11.9697	14.7181	12.2223	8.55116
11.9937	14.3716	12.2483	8.61222
		12.2742	8.66007
		12.3002	8.69595
		12.3261	8.71862
		12.3521	8.72932
		12.378	8.72869
		12.404	8.71358
		12.4299	8.68777
		12.4559	8.65063
		12.4818	8.6053
		12.5078	8.55556
		12.5337	8.50331
		12.5597	8.4498
		12.5856	8.4051
		12.6116	8.37048
		12.6375	8.36229
		12.6635	8.39125
		12.6894	8.48317
		12.7154	8.66825
		12.7413	8.98366
		12.7673	9.4873
		12.7932	10.2352
		12.8192	11.3186
		12.8451	12.8428
		12.8711	14.8737
		12.897	17.5178
		12.923	20.8255
		12.9489	24.8332
		12.9749	29.5944
		13.0008	35.0589
		13.0268	41.1265
		13.0527	47.682
		13.0787	54.6127
		13.1046	61.692
		13.1306	68.8909
		13.1565	75.7171
		13.1825	82.0654
		13.2084	87.7169
		13.2344	92.5071
		13.2603	96.2668
		13.2863	98.7522
		13.3122	100
		13.3382	99.9137
		13.3641	98.5457
		13.3901	95.947
		13.416	92.2792
		13.442	87.7805
		13.4679	82.6031
		13.4939	76.9585
		13.5198	70.9803
		13.5458	65.1394
		13.5717	59.5012
		13.5977	54.1626
		13.6236	49.2439
		13.6496	44.8314
		13.6755	41.0314
		13.7015	37.664
		13.7274	34.9248
		13.7534	32.6534
		13.7793	30.7478
		13.8053	29.2715
		13.8312	28.1295
		13.8572	27.3016
		13.8831	26.7187
		13.9091	26.3699
		13.935	26.2509
		13.961	26.3132
		13.9869	26.5493
		14.0129	26.939
		14.0388	27.4622
		14.0648	28.11
		14.0907	28.8484
		14.1167	29.6706
		14.1426	30.569
		14.1685	31.5202
		14.1945	32.5055
		14.2204	33.5127
		14.2464	34.5131
		14.2723	35.4902
		14.2983	36.4376
		14.3242	37.3429
		14.3502	38.1865
		14.3762	38.9413
		14.4021	39.6125
		14.4281	40.1822
		14.454	40.6443
		14.48	40.9981
		14.5059	41.2348
		14.5319	41.3475
		14.5578	41.3513
		14.5838	41.2461
		14.6097	41.0314
		14.6357	40.7343
		14.6616	40.3559
		14.6875	39.9001
		14.7135	39.394
		14.7394	38.8444
		14.7654	38.2633
		14.7913	37.6514
		14.8173	37.0363
		14.8432	36.4206
		14.8692	35.8037
		14.8951	35.1842
		14.9211	34.5805
		14.9471	33.9692
		14.973	33.3409
		14.999	32.7013
