# Supplementary material for: Activation of the archaeal ion channel MthK is exquisitely regulated by temperature
Source: eLife. 2020 Dec 4;9:e59055. doi: 10.7554/eLife.59055 (PMC7717905; doi:10.7554/eLife.59055)
Supplement: Figure 3—source data 1. [file elife-59055-fig3-data1.xlsx]

## Sheet: Sheet1
Fig 3B	Open dwell time (ms)			Fig 3C
Temperature	20	36			open dwell time	SEM	n	unitary conductance	SEM	n
	3.5201	0.28		21C	18.62	6.06	5	164.4	17.2	5
	3.36	0.48		37C	4.74	1.8	5	227.7	24.9	5
	2.36	9.2
	16.08	0.48
	1.2	1.32
	3.56	3.64
	8.08	2.08
	44.0799	1.52
	31.08	2.4
	28.44	3.08
	7.64	1.6
	48.0799	2.88
	8.9599	0.48
	9	1.24
	26.04	3.08
	2.7601	0.32
	0.0801	0.48
	29.44	3.08
	11.4	1.76
	3.3999	0.7199
	7.4001	0.6799
	4.76	1.96
	3.5601	5.04
	5.4799	0.44
	6.3198	1.72
	6.2001	3.72
	11.08	0.08
	15.68	2.1199
	0.16	1.64
	15.0798	0.6001
	7.2802	0.64
	0.8	0.1599
	16.48	0.92
	26.8799	2.5199
	27.72	0.3599
	16.3202	0.28
	17.2399	0.2
	4.2801	4.4399
	6.4402	0.7999
	4.32	3.52
	4.8398	1.64
	19.92	2.16
	17	1.32
	7.3602	0.3599
	45.6799	2.08
	9.7599	1.8401
	19	0.32
	38.8799	0.8
	11.04	1.28
	13.6798	10.48
	2.1201	1.8801
	3.24	3.04
	5.2799	0.1201
	12.36	1.9601
	5.3198	0.0801
	14.3599	4.2401
	17.6001	1.9199
	7.6799	2.16
	4.0801	0.3599
	1.2802	1.7601
	23.2002	2.16
	9.7201	2.6802
	10.08	1.24
	0.3999	1.2001
	7.3599	0.96
	2.72	1.7599
	18.3999	5.2799
	38.3198	0.3999
	3.3599	1.52
	8.7602	1.2798
	7.64	0.28
	9.9199	0.4399
	4.3999	1.5598
	3.92	0.92
	1.08	2.2399
	0.76	4.1601
	42.8399	1.8399
	3.16	3.16
	8.04	4.0801
	3.2403	0.56
	16.8398	0.1598
	13.159	1.44
	8.12	0.9599
	51.4394	2.36
	4.8395	0.52
	5	4.8402
	7.2001	1.6
	5.84	1.3599
	0.5205	1.6799
	4.0803	2.7198
	2.2795	2.92
	22.7595	3.3602
	1.2003	1.72
	16.6398	0.52
	10.3605	1.6001
	2.6407	1.48
	5.4805	0.6
	18.2001	1.24
	2.801	3.64
	3.1602	0.5201
	6.96	0.7198
	14.96	0.9199
	7.5998	3.6401
	31.96	0.5998
	12.3995	0.3999
	14.6407	2.3599
	0.3605	0.6802
	17.5998	0.2401
	12.8399	1.28
	14.7597	1.2399
	14.3602	3.9199
	4.4005	0.7998
	4.96	0.56
	10.6798	0.3602
	11.5205	1.52
	0.6407	1.48
	10.5598	1.68
	14.2793	2.8799
	0.721	4.6802
	2.7595	6.3599
	19.84	3.8802
	17.6807	0.2401
	36.5193	2
	13.7597	0.08
	5.5602	0.12
	18.3995	0.84
	4.4406	3.1601
	34.641	2.28
	2.6398	0.9602
	14.7198	1.2399
	21.04	0.9599
	6.5205	0.24
	19.7195	0.44
	3.3995	0.7602
	5.4798	0.2399
	18.7595	0.6802
	26.1201	4.48
	31.5207	0.4
	4.159	0.1998
	3.1201	1.96
	6.8	0.52
	1.16	4.16
	21.6398	4.96
	5.08	1.04
	1.1203	0.8802
	14.721	0.56
	3.4805	7.56
	34.2003	1.3599
	0.2005	7.44
	5.239	2.6001
	8.801	1.3999
	3.4805	1.1201
	9.92	0.68
	8.7997	0.5598
	7.199	0.48
	5.0805	5.12
	3.2402	0.7601
	6.5607	0.12
	23.841	0.1599
	3.5998	0.1601
	6.359	0.2399
	0.08	0.2799
	10.5202	0.56
	26.2805	0.1601
	2	2.7601
	4.6396	0.1601
	0.6795	0.1998
	3	0.2402
	4.08	1.2801
	1.96	0.2
	22.5198	0.6398
	1.3204	0.7999
	12.9195	0.4
	6.5594	0.88
	8.2002	1.8801
	6.5595	0.5598
	4.92	0.5998
	5.92	1.08
	10	1.5201
	1.7198	1.04
	28.2003	0.2401
	10.2005	0.1598
	0.6795	0.1998
	4.7595	0.48
	2.7598	0.1999
	2.72	0.2801
	3.5205	0.0801
	7.7595	0.28
	3.6405	1.36
	2.681	0.0798
	1.3593	0.52
	6.2801	0.2399
	4.2401	0.8802
	5	3
	5.4395	0.4399
	11.5193	0.12
	19.16	1.7999
	0.239	0.1601
	15.1601	0.24
	22.4005	0.48
	1.96	0.1601
	15.079	0.12
	25.4002	1.2001
	9.04	0.2405
	9.96	0.08
	22.96	0.6405
	6.92	0.6797
	18.1602	0.279
	30.3993	0.2
	13.5605	0.08
	9.6407	0.2002
	1.721	0.3205
	5.0801	0.3595
	0.7196	0.1203
	3.6396	0.6805
	11.2405	0.2405
	9.4794	0.0801
	5.96	0.12
	0.96	0.7599
	27.4805	0.2802
	20.2793	0.1605
	14.5598	4.2401
	4.7998	0.4002
	5.5206	0.1201
	8.2003	0.1203
	5.2805	0.2802
	4.1603	0.6005
	10.08	0.3593
	16.7595	0.16
	7.4795	1.279
	45	0.08
	2.7598	0.2402
	6.4005	0.159
	42.4002	5.04
	4.6007	0.4002
	1.3202	0.3604
	17.04	1.3995
	1.319	0.2003
	6.3606	1.2005
	0.5595	0.239
	6.6795	0.4793
	12.7198	0.279
	1.0405	1.92
	7.0401	0.5205
	7.2793	1.5607
	2.6407	1.16
	4.5595	0.16
	5.7198	0.88
	7.4802	0.119
	11.3193	0.4395
	18.8397	0.12
	4.239	0.1603
	35.681	0.199
	1.76	0.2805
	4.3593	0.0801
	0.5195	0.0805
	17.041	0.4795
	7.76	0.199
	18.801	0.239
	24.0801	0.4005
	1.7189	0.6007
	17.5604	0.2
	4.6795	0.319
	24.84	0.5598
	8.1191	0.5598
	13.4785	1.12
	1.881	0.92
	18.4806	1.2
	14.08	0.6007
	8.08	0.16
	41.6819	1.7997
	2.5587	0.3606
	21.121	0.5595
	8.1602	0.0801
	11.959	2.881
	15.8787	1.1203
	10.2792	1.5206
	8.8397	1
	13.08	0.8799
	9.76	0.8399
	11.721	0.4793
	4.5195	3.3204
	8.16	0.079
	3.041	1.4806
	0.119	0.12
	10.8397	0.2401
	14.5604	0.92
	2.8395	0.6396
	14.6795	0.2
	12.4785	0.2805
	7.3982	0.3202
	13.281	0.2801
	32.5604	0.2405
	13.08	0.3193
	2.5218	0.2001
	43.7209	0.4395
	5.6818	0.079
	18.1601	0.5995
	8.1993	1.08
	4.3592	1.0405
	2.7206	0.2005
	7.121	0.279
	11.1195	0.2402
	4.3205	0.4002
	3.7205	2.88
	21.6385	1.12
	2.961	1.9599
	11.4398	0.5206
	4.879	0.6007
	16.6405	0.1205
	2.801	0.5994
	2.2405	0.16
	27.3595	0.2805
	16.16	0.961
	1.9195	2.4807
	4.4803	0.12
	9.6795	1.6395
	13.92	0.2795
	2.24	0.3593
	2.2793	0.239
	10.6795	0.119
	2.3202	0.2405
	3.16	0.1203
	2.9195	2.3604
	16.7597	1
	0.9195	0.3203
	23.76	0.3995
	6.3186	0.3204
	6.7598	0.5605
	28.8809	0.08
	6.4414	0.4002
	31.1215	0.2003
	7.92	1.3605
	2.3593	0.3593
	21.08	0.9195
	7.4806	0.6795
	22.24	0.681
	1.3595	0.08
	16.7208	1.0803
	7.3204	0.4406
	0.8005	1.5995
	0.0801	0.3595
	5.24	0.1601
	12.4804	0.3193
	15	0.24
	9.84	0.2805
	46.1605	0.12
	20.8789	2.04
	4.5214	1.319
	8.5585	0.3193
	15.5195	5
	4.041	1.5594
	25	0.3202
	4.8009	0.12
	4.4003	0.4807
	3.2381	1.119
	41	0.6405
	18.08	0.12
	6.5608	0.2405
	18.119	0.0803
	11.3203	1.3593
	14.76	0.2001
	5.7595	0.4394
	11.7597	0.2793
	2.24	3.5995
	0.4005	0.4395
	1.6018	0.2001
	21.959	0.2793
	0.5605	0.1201
	30.879	0.159
	30.799	0.5193
	6.2791	0.12
	16.121	0.4405
	3.3205	0.3195
	6.5607	0.08
	25.6797	0.2003
	29.199	1.6407
	31.1603	0.6797
	2.1993	0.2804
	1.6407	2.7595
	13.3592	0.3605
	18.16	0.6807
	0.5995	0.4795
	6.4395	1.2393
	10.3205	0.6797
	30.0801	1.5207
	3.3182	0.08
	1.5585	1.4393
	2.4786	0.2405
	22.5605	0.3994
	21.5197	0.2405
	17.16	1.5598
	7.6818	0.8399
	20	0.2003
	15.8008	0.2405
	4.1603	0.2003
	50.4787	0.5202
	5.6408	0.08
	5.6795	0.6795
	1.201	1.5607
	4.199	0.2003
	0.08	0.5195
	7.6795	0.2804
	47.4802	2.08
	1.84	0.2802
	13.041	0.7195
	2.3982	2.6795
	22.7595	0.3205
	11.16	1.9199
	1.8419	4.6798
	7.6409	3.4793
	10.6814	2.04
	1.5585	0.8399
	6.1195	1.4405
	29.5198	0.5994
	17.6409	0.3995
	6.2405	2.4005
	6	0.4794
	18.2401	0.2402
	6.4786	0.079
	6.4398	0.3993
	16.6405	0.3205
	25.4397	0.5995
	1.8805	0.2804
	20.4003	0.3605
	3.1602	0.5595
	20.4415	0.08
	8.1993	0.28
	3	0.6395
	1.92	0.3994
	5.3595	0.1601
	9.4392	0.7997
	23.5197	0.4795
	11.2795	0.3605
	0.6796	3.0803
	1.7189	1.1605
	8.4003	0.3995
	14.6385	0.2802
	18.8809	1.159
	4.92	0.08
	3.4397	0.4794
	14.1195	0.0801
	12.9219	0.159
	15.8009	0.08
	5.3592	0.4795
	16.1581	1.4005
	24.959	2.4006
	4.1602	0.2793
	1	0.4805
	11.1193	0.3201
	26.76	0.119
	20.8807	0.1203
	2.7205	0.2805
	23.6018	0.5195
	7.4005	0.5195
	10.16	0.6395
	4.4393	1.2803
	1.24	4.6405
	4.4785	0.3602
	0.5996	0.7998
	6.3204	0.5995
	1.3202	1.2403
	7.7595	0.88
	15.879	2.3605
	4.92	1.3993
	1.2811	0.16
	5.959	0.2805
	7.279	0.7597
	15.7209	0.12
	1.5586	1.4005
	4.961	2.96
	5.9589	0.4793
	8.6798	1.5593
	4.7208	1.1601
	0.6795	4.199
	15.7985	4.239
	0.92	0.6805
	3.2405	2.2002
	1	4.6807
	6.08	1.159
	25.1213	3.6007
	18.08	1.6396
	3.2791	3.4406
	11.7985	2.6407
	2.4803	0.88
	26.7595	4.5595
	19.6796	0.3993
	6.1193	2.6408
	21.5195	5.5606
	12.6795	1.5995
	0.1191	14.6387
	6.4005	0.6387
	9.0801	1.1995
	13.16	1.92
	3.3594	0.8397
	1.201	0.5605
	1.039	9.5997
	5.7595	4.3205
	15.4396	0.1581
	4.84	3
	5.4398	0.16
	0.961	0.8395
	5.8807	0.5214
	8.4803	2.7187
	35.039	0.4415
	7.7187	6.7187
	9.16	3.4005
	55.4805	0.5197
	6.7595	1.7209
	28.199	0.76
	10.3592	2
	6.0803	1.881
	10.5587	3.08
	3.2405	2
	25.3204	2.5605
	5.039	0.5194
	14.3205	2.1191
	1.9199	5.959
	22.7597	5.6795
	7.6797	13.7205
	39.3613	2
	10.16	6.92
	6.719	1
	5.8399	0.639
	5	3.2405
	24.5996	8.9609
	8.039	1.5604
	19.1213	4.959
	5.4005	0.7596
	1.8007	0.879
	8.08	2.121
	9.5995	5.6385
	12.16	2
	32.9197	0.4395
	20.4006	0.68
	5.1991	1.0801
	2.1992	11.961
	25.5605	5.92
	23.4005	6.2794
	8.4003	2.8805
	4.6407	0.16
	6.92	2.2381
	1.1583	3.2382
	24.719	1.3986
	19.879	6.6405
	15.5585	2.1605
	4.4788	0.5586
	4.5605	0.7187
	1.5195	3.879
	5.8809	3.879
	15.7985	1.7205
	41.5994	1.039
	3.5995	4.8807
	25.881	2.3593
	13.201	0.7597
	4.9589	1.4005
	16.5995	1.92
	0.6385	8.201
	0.3615	1.881
	21.16	3.8007
	2.4395	4.0805
	2.5195	2.041
	26.3205	2.5215
	1.9199	1.3982
	6.4395	0.5995
	21.2405	1.4805
	4.08	0.1602
	15.4784	0.8009
	12.5197	0.199
	8.4415	0.2814
	8.8825	1.4805
	4.6015	0.3986
	10.8007	1.2815
	6.6015	0.5995
	25.758	2.881
	7.5585	1.6408
	29.7189	0.1213
	18.3595	1.041
	55.6797	0.3595
	63.84	3
	16.082	0.4805
	10.199	0.3182
	3.039	3.92
	10.4022	2.1995
	9.1175	0.4804
	43.082	1.6404
	1.0823	0.16
	0.7189	0.5193
	54	5.92
	25.2385	3.961
	13.1602	3.5195
	42.5976	0.4005
	7.961	0.959
	8.0781	0.4395
	1.5975	0.119
	2.3982	1.4806
	27.4806	0.6407
	11.6407	0.2401
	4.7965	0.7595
	5.4372	0.1995
	0.9215	1
	2.961	0.7595
	23.3595	10.041
	11	0.08
	12.9219	1.2405
	6.5628	6.7189
	13.5585	0.3593
	13.7967	0.7205
	0.879	0.6014
	16.039	0.3182
	2.1992	0.4005
	2.3985	16.5996
	48.6404	0.201
	1.242	3.5587
	4.3985	2.7209
	5.84	1
	23.3594	0.2811
	9	1.68
	2.3595	0.8789
	1.6369	2.6405
	2.6405	0.3205
	0.7575	8.3203
	3.3631	4.4787
	2.3205	2.1991
	10.2773	1.4805
	4.2035	1.3205
	14.3205	1.8009
	17.5588	0.7619
	2.4414	1.4003
	7.922	0.4802
	1.16	2.1191
	16.5192	4.881
	6.121	2.9199
	7	0.6818
	5.918	1.6408
	4.6406	1.2401
	0.4412	1.4005
	2.801	0.201
	2.4021	5.6408
	3.2775	1.16
	20.2813	3.7987
	3.4802	1.1995
	28.4416	1.7599
	9.4023	2.039
	6.2381	1.8805
	2.2815	0.84
	28.3592	1.08
	4.1211	0.2791
	7.2813	5.3205
	37.3595	9.5998
	8.2813	1.2405
	11.7185	2
	2	2.881
	1.4803	0.4395
	5	0.3205
	0.8005	0.3203
	10.5195	0.879
	58.281	10.0395
	4.1213	0.5996
	13.5625	2.8805
	6.879	0.639
	2.2811	0.7208
	6.9215	7.8809
	16.6365	4.6795
	13.7185	0.8809
	9.8395	5.4395
	6.2385	3.7209
	6.039	1.041
	4.0821	1.799
	1.3985	1.2013
	28.961	0.3592
	23.84	0.6799
	4.1211	0.3204
	0.3205	0.5585
	10.6838	1.4805
	8.6405	0.7187
	23.1602	1
	12.5978	0.4396
	28.801	0.16
	11.6799	0.7595
	1.4372	2.4003
	13.2382	0.76
	1.039	0.5605
	15.6405	3
	0.4023	0.2405
	9.4025	0.1602
	0.3205	0.2794
	2.8397	2.0395
	17.082	0.7208
	0.6018	0.5587
	1.8395	0.1211
	13.961	2.08
	1.961	1.7599
	16.2381	0.5995
	4.1991	0.84
	10.9607	1
	3.4378	2.201
	5.7618	0.4002
	0.5979	0.5605
	1.6405	0.5997
	0.2811	5.4395
	1.5978	6
	19.3985	1.3592
	5.1992	1.6795
	9.4764	5.2405
	0.1601	4.5604
	12.3596	2.5197
	3.3985	0.7208
	2.6405	4.8809
	2.043	0.6385
	4.2813	12.9605
	6.801	1.6819
	4.2811	4.5195
	1.2381	1.1993
	0.5628	2.6387
	6.879	1.5195
	4.3205	1.3203
	1	2.961
	5.9605	1.801
	10.7965	0.7205
	19.3985	7.801
	2.918	2.6797
	5.7615	2.879
	4.039	0.3202
	22.8395	0.879
	7.7187	7.119
	22.4025	1.8399
	17.6406	3.7598
	6.4412	1.6798
	40.3633	1.16
	21.117	0.281
	6.4765	1
	0.2421	0.5603
	12.6797	1.039
	1.2382	3.3592
	6.922	4.281
	1.1171	3.8809
	4	1.4392
	6.1993	0.5605
	0.3592	4
	1.1605	5.4392
	0.1993	2.3615
	12.1995	4.4806
	5.879	6.5198
	9.16	5.1603
	2.16	1.6386
	3.7187	0.2381
	1.8395	4.801
	31.3593	4.801
	13.2383	3.2405
	2.2812	1.4393
	0.199	5.719
	20.3595	6.92
	59.5585	0.6407
	15.039	0.7987
	3.5585	0.4415
	87.1602	1
	12.6017	5.5214
	0.8785	2.5996
	10.281	0.4414
	4.6799	3.3203
	4.7226	1.2402
	26.039	0.6405
	1.121	0.5214
	6.3595	0.4392
	10.3202	0.08
	0.3162	0.6798
	1.082	0.16
	10.082	0.4393
	16.4376	1.119
	2.5628	1.4805
	10.6014	0.5196
	1.2421	1.7208
	7.4806	0.8785
	0.6365	0.121
	18.5195	1.5995
	6.6015	0.08
	27.1211	0.08
	2.121	0.199
	21.84	0.1601
	12.7618	1.92
	11.4022	0.2795
	0.5978	2.5607
	5.5194	0.879
	7.879	1.6795
	8.2811	0.4805
	70.1995	6.039
	1.2813	1.5198
	15.6795	0.16
	4.4025	0.2791
	2.5588	0.2015
	73.3205	1.4003
	18.2815	0.4002
	13.2383	1.7989
	1.9219	0.2011
	9.879	0.1581
	4.7185	0.4803
	3	0.84
	10.957	0.1605
	3.5627	0.6387
	2.5975	0.7599
	2.7575	0.4808
	29.281	0.16
	19.3205	0.7596
	2.082	0.2793
	30.8399	2.961
	3.7617	0.0805
	5.918	0.5605
	5.5979	0.2792
	4.8009	0.8395
	6.1993	0.5995
	1.6015	3.041
	1.3203	0.0805
	9.9607	0.2815
	26.3595	0.1601
	33.082	0.08
	28.9179	0.16
	6.68	2.5195
	1.961	0.4005
	36.4805	3.8009
	1.918	1.08
	6.922	0.881
	2.9609	1.92
	3.2815	0.8395
	20.7617	0.76
	7.879	1.2795
	17.4805	1.881
	3.6365	1.08
	2.961	0.4395
	33.0781	0.799
	10.8787	0.1993
	10.957	0.1605
	0.879	2.6797
	3.879	0.2792
	14.3202	0.2013
	6.4804	2
	11	0.5997
	1.043	0.24
	2.922	0.4392
	15.3203	0.119
	18.5198	0.0801
	5.8825	0.2795
	13.1171	0.1605
	24.117	2.6799
	29.8399	0.5585
	24.8009	1.5995
	58.5588	0.4395
	4.2812	0.3205
	6.8399	0.879
	3.2384	0.7185
	47	0.119
	43.3592	0.7595
	35.039	0.6405
	2.082	0.3595
	2.7227	0.201
	1.3202	0.5998
	23.5625	1.08
	14	0.08
	13.4765	0.3592
	26.4414	0.4005
	0.121	0.3182
	35.4025	0.1211
	24	0.3592
	1.6365	1.3205
	19.4805	0.5605
	11.4378	5.1605
	8.1171	3.6409
	0.4805	4.8809
	19.0783	0.2403
	4.8785	3.5195
	16.9607	2.2404
	3.5625	3.4804
	2.043	6.4395
	11.3594	3.3182
	5.2775	5.7207
	12.8787	3.5195
	9.5587	1.4802
	1.957	0.2381
	22.879	1
	2.3984	0.1995
	21.039	0.24
	3.6795	0.08
	15.4372	0.3614
	12.6797	0.1991
	1.2812	0.959
	10	2.1991
	4.5585	0.1603
	5.4376	1.6798
	5.7616	1.039
	8.5975	0.5998
	5.4764	0.1601
	3.7579	1.961
	40.7619	2
	11.8009	0.1603
	53	0.7187
	17.84	9.721
	17.2772	0.199
	5.4415	3.4804
	16.3203	1.8008
	24.5588	0.2403
	5.3594	2.6407
	4.8829	0.4415
	3.121	1.6018
	12.6405	5.2405
	4.3595	0.7185
	65.078	0.6405
	29	0.84
	17.9609	1
	42.8009	0.2405
	20.84	0.08
	3.5192	0.2011
	1.1215	1.3593
	3.1603	0.4785
	12.883	1.5995
	9.242	0.5607
	51.4375	2.3203
	1.2033	4.5194
	8.3595	2
	0.4805	6.7206
	10.3201	1.3203
	4.281	8.3594
	10.117	1.24
	5.281	1.4783
	34.84	0.5995
	5.16	2.5216
	5.922	2.4415
	19.078	9.8005
	33.121	0.4005
	17.082	0.4808
	109.16	0.799
	2.3163	0.879
	0.6016	3.2011
	10.039	0.799
	19.078	0.4001
	3.2813	1.6015
	8.121	0.5998
	11.7579	5.7205
	4.4803	13.9607
	46.5585	2.1583
	17.9215	1.76
	9.6407	1.4002
	9.7187	2.959
	23.3202	1.5195
	3.16	2.201
	13.6017	6.6405
	15.6799	0.1193
	19.039	0.2015
	3.961	1.1601
	5.922	3.041
	3.1605	0.84
	8.7185	3.4805
	20.1991	0.2793
	15.121	10.959
	4.2035	1.5996
	4.8009	5.959
	11.883	1.041
	29.117	0.2815
	20.6405	0.6389
	6.6407	1.961
	9.4767	2.1215
	10.2733	0.6404
	0.922	3.078
	1.1562	1.5624
	21	5.3982
	36.4765	3.961
	11.156	1.957
	15.5935	5.078
	7.0781	1.4022
	2.2421	0.7615
	11	6.2033
	1.3205	7.4806
	5.3672	4.8009
	30.6406	3.879
	5.3988	1.043
	7.4765	2.1171
	10.3593	2.4375
	23.078	5.4375
	1.0391	2.199
	13.1563	4.078
	3.4065	3.4415
	6.3201	1
	3.1565	0.9609
	5.7969	2.2815
	13.4846	0.4023
	5.9219	4.3202
	2.914	3.9179
	35.1561	1.2423
	24.1953	1.9215
	3.5626	0.1993
	0.3986	6.6018
	20.2421	0.4764
	11.0783	1.039
	0.883	1.1991
	0.961	2.7577
	3.6405	4.4413
	20.5158	0.1603
	21.4065	1.6797
	5.125	0.2382
	5.3985	0.078
	25.2425	2.5197
	14.117	0.4414
	4.078	5.918
	10.6015	2.3205
	16.125	0.7619
	27.883	3.879
	5.3672	0.762
	14.1641	0.8397
	1.8829	3.7185
	8.3985	2.6795
	1.5235	1.758
	11.4374	1.6405
	2.086	0.5978
	51.922	1.8789
	2.1562	1.6018
	1.6798	0.5195
	0.6797	10.3986
	7.3593	1.6408
	3.2342	0.9219
	1.7655	4.4023
	7.4375	2.3164
	18.4372	9.043
	8.4455	0.3635
	14.9217	1.1601
	11.961	1.5198
	2.086	6.6798
	0.6405	0.5235
	36.7187	0.3203
	5.4455	6.082
	18.6018	2.8397
	0.2031	1.8395
	0.8825	4.1602
	11.7188	1.8829
	7.883	1.4415
	0.281	2.3984
	21.1173	4.3205
	14.2425	0.6365
	5.3986	3.16
	0.4843	0.121
	25.3202	2.3205
	18.1645	5.4805
	2.8828	7.84
	7.883	2.8399
	7.4767	1.6015
	4.2425	0.4373
	28.4842	3.039
	13.164	4.2381
	11.875	0.1993
	26.3595	2.8785
	13.6017	1.16
	21.8357	0.4024
	3.242	1.3201
	10.9219	1.281
	3.2425	1.039
	10.7578	4.7578
	2.883	1.6365
	6.4842	2
	8.8825	0.082
	5.4375	2.5978
	2.797	3.3988
	1.6018	1.3595
	6	6.242
	1.961	1.7619
	20.4452	1.2382
	18.1565	1.082
	23.875	0.7615
	8.6015	1.3985
	0.078	1.5627
	16.1641	10.922
	43.1955	2.5585
	22.7578	4.8009
	6.883	3.8007
	9.6405	1.3592
	8.6796	2.6404
	1.2815	2
	20.3672	0.4021
	1.6015	3.1991
	5.6407	0.4412
	0.3205	1.4802
	2.8048	2.5977
	3.0391	0.2811
	5.4768	2.0391
	5	1.043
	4.3205	2.879
	11.086	4.16
	9.6795	1.8789
	3.7967	4.2425
	3.039	4.7579
	3.3593	8.043
	50	1.117
	12.047	1.16
	6.164	5.1991
	0.961	9.2035
	0.1175	7.5976
	19.2425	1.6408
	12.7575	2.2813
	7.961	1.3205
	29.3202	1.1211
	2.7185	1.84
	5.922	6.5195
	3.875	0.5192
	6.2815	0.3982
	0.0783	1.8827
	1.156	5.082
	3.6798	6.078
	5.4765	0.879
	13.2815	0.922
	1.8048	5.2421
	1.875	4.2813
	6.3595	0.7617
	6.8827	3.082
	9.8437	4.883
	12.4845	8.5588
	12.2421	0.4803
	18.3205	0.5235
	15.1562	5.3201
	6.1563	1.8397
	0.6796	1.1215
	3.8828	1.3203
	2.7577	3.8007
	3.3982	1.281
	12.8439	1.3983
	3.039	2.6409
	6.2813	0.84
	2	6.3592
	20.3202	4.8005
	2.961	2.3982
	1.2812	1.7188
	6.3988	0.3635
	18.2811	0.082
	3.1563	0.3203
	15.2733	3.2772
	23.039	8.8007
	4.8435	0.4413
	0.5235	1.7185
	0.1641	0.1561
	6.2425	1.5198
	5.3593	0.957
	2.242	0.0821
	2.4378	0.2815
	6.0781	0.242
	11.875	1.6369
	8.953	2.2772
	19.3983	7.039
	1.2732	0.078
	4.875	1.6405
	3	0.1991
	5.6015	4.6405
	11.2815	0.6408
	0.2421	2.6405
	13.6018	5.957
	3.3592	3.5585
	0.7578	1.3205
	12.5624	1.8008
	37.836	0.918
	7.922	1.0821
	15.4062	1.5582
	11.1952	0.3203
	11.4455	2.961
	7.0781	0.3205
	5.7969	3.3205
	38.3984	0.6796
	4.3205	2.719
	5.2425	2.7188
	0.8829	1
	0.1171	1.5978
	1.1563	1.1993
	0.7657	1.6797
	11.2812	3.5196
	2.875	4.84
	1.7579	0.4415
	9.2815	5.2383
	2.0781	2.6795
	5.3203	4
	32.914	1.039
	2.5233	0.8399
	5.7187	0.3593
	3.4845	0.3591
	1.3986	0.5196
	1.2814	5.8789
	7.0783	5.8829
	0.7187	5.4803
	0.078	9.758
	0.2423	2.6015
	8.4373	11.84
	22.5235	6.4375
	6.6797	3.8008
	0.3595	0.32
	13.0781	2.3635
	0.9219	3.3205
	0.4453	5.8009
	6.0395	2.3985
	3.6328	3.16
	6.7657	4.922
	9.961	1.9609
	9.6795	4.7185
	12.922	4.9177
	4	2.8829
	1.4765	4.4414
	11.922	1.7186
	7.4845	0.7969
	0.117	0.6797
	2.4377	0.922
	1.6405	2.7615
	3.961	1.5975
	1.8829	2.8439
	0.6409	10.039
	13.961	0.5979
	0.3593	3
	10.6015	5.918
	4.3202	9.5198
	7.5627	0.3205
	0.32	10.3204
	19.5235	0.5979
	18.6018	0.9219
	49	3.3592
	5.4378	15.4807
	2.5235	2.8397
	3.2423	2.16
	24.125	4.6798
	10.3985	0.6796
	18.078	2.4418
	11.836	4.8398
	18.914	2.8399
	9.6406	7.961
	9.4376	21.3595
	2.961	3.5625
	8.7187	2.879
	4.047	1.1173
	0.078	4.4806
	9.5157	4.6015
	0.4375	4.8395
	7.3675	6.6365
	8.797	1.8785
	4.039	1.6799
	23.6408	3.918
	1.1953	2.5975
	6.164	0.918
	2.5155	3.5588
	5.117	0.6018
	6	0.4804
	6.3592	3.3591
	22.5548	1.1995
	0.6409	0.5194
	2.4065	2.2382
	25.6795	4.7227
	0.875	3.7227
	7.6799	9.2811
	9.242	1.879
	0.4845	4.9179
	10.7579	2.5588
	6.9609	1.117
	20.086	1.1601
	11.039	4.2385
	19.719	1.719
	4.125	1.5236
	4.8045	0.5978
	3	1.5584
	1.2421	2.1991
	14.039	0.758
	0.5545	3.3985
	12.5627	2.3986
	22.922	4.6015
	6.4768	2.5238
	5.078	2
	7.953	1.4805
	6.5158	4.7965
	14.6405	1
	0.3592	0.4418
	7.836	2.1601
	1.8825	3.082
	10.164	2.7225
	22.281	3.719
	33	2.918
	6.164	0.2772
	1.7578	4.961
	11.6405	3.2811
	8.047	0.4807
	2.3595	3.2425
	0.086	3.797
	0.6406	5.758
	14.6018	4.3983
	1.125	1.3203
	2.6405	2.957
	3.3983	6.16
	5.5625	7.4805
	8.242	2.7575
	11.805	3.5192
	11.6014	0.7577
	23.117	0.16
	4.7579	0.4803
	3.6797	0.7575
	1.7187	0.121
	31	2.1213
	1.4762	0.758
	17.836	3.6365
	0.078	4.7579
	4.078	4.5198
	4.9217	1.5978
	3.836	4.1561
	12.2425	0.3988
	5.2033	0.1992
	3.2813	2.3204
	10.914	1.16
	5.7577	0.7967
	12.5627	0.5585
	8.961	2.2383
	3	0.4025
	2.8828	1.8397
	14.5158	3.3593
	10.5235	8.6795
	4.242	0.4802
	18.836	9.043
	2.6405	2.3202
	0.3984	2.7577
	1.4376	1.4802
	4.961	2.3202
	5.922	4.4415
	6.4375	2.5627
	13.125	4.2812
	6.922	2.7618
	4.5232	1.3595
	0.961	7.0821
	5.3984	0.6408
	1.2031	0.6797
	0.8048	2.7187
	7.2422	1.7227
	11.7579	0.8009
	0.281	0.6795
	1.1171	2.2381
	23.0783	0.2421
	0.8437	2.3592
	0.5622	2.281
	7.7575	10.2423
	5.5547	11.6406
	2.4765	1.84
	3.6797	2.3635
	2.039	0.16
	11.4764	0.7575
	27.8438	0.6799
	4.5622	5.3986
	8.8047	3
	28.1173	3.5235
	10.953	2.8825
	6	1.6015
	21	7.6015
	14.1643	1.0785
	19.0391	0.3202
	6.7967	2.1991
	24.3203	3.918
	2.3205	3.4414
	17.086	5
	17.2423	2.5193
	23.6407	2.2425
	3.039	8.2421
	1.1562	6.4805
	2.719	11.3595
	5.883	2.5198
	3.3592	0.3595
	10.4375	0.6838
	5.875	0.7188
	0.3204	1.6407
	7.3205	1.082
	26.8437	0.922
	14.797	2.5587
	28.078	26.7226
	5.5238	1.121
	11.7578	3.039
	0.164	10.121
	0.7267	7.5195
	9.9215	3.957
	5.6795	5.6406
	5.922	2
	36.7188	16.039
	7.203	6.4378
	27.7579	1.7619
	23.5937	3
	0.4062	3.0781
	13.117	0.3633
	21.6408	4.3985
	3.242	0.4374
	1.8049	2.5585
	3.164	0.5584
	2.6795	1.2423
	14.4454	1.1601
	10.039	2.3205
	51.9219	7.6407
	0.7265	9.0785
	5.5236	4.1995
	2.2735	0.3596
	2.4768	3.5195
	11.3202	3.5587
	6.6797	0.4415
	31.2421	3.6796
	16.9609	4
	26.086	2.918
	2.8825	2.6018
	24.8435	3.6795
	3.3205	3.5194
	1.7579	3
	3.914	5.2384
	1.3205	7.0395
	30.2035	0.7228
	10.9217	0.4805
	1.961	1.1605
	1.203	2.3595
	9.2735	2.8398
	8.2035	6.2811
	10	0.8399
	8.5236	3.117
	2.4453	5.3205
	6.4766	0.5628
	16.3201	0.5624
	1.086	1.4372
	14.9607	2.961
	26.242	3.4372
	7.3202	1.16
	9.961	2.5195
	14.2035	16.2382
	3.0781	5.1175
	10.3982	1.6409
	14.1951	3.1992
	8.4845	0.4805
	1.5158	15.4412
	6.4765	4.5236
	27.242	2.922
	23	1.1991
	0.6795	5.203
	0.4373	0.4415
	9.7185	4.922
	4.32	0.8399
	17.6795	2.4808
	2.2735	4.4023
	24.1172	1.9605
	18.4455	0.5192
	38.7267	5.2814
	15.3982	0.6405
	29.281	3.16
	0.6014	1.758
	41.6874	1.4802
	25.125	8.9219
	8.078	1.918
	24.4373	3.7185
	15.5625	1.121
	0.758	2.5585
	8.3593	1.879
	32.7577	4
	51.922	5.8395
	6.875	1.7615
	30	0.5194
	39.2815	0.6795
	2.039	4
	6.047	3.5192
	17.7579	2.5622
	2.5157	2.8789
	0.836	1.039
	5	1.4412
	21.875	1.2422
	42.0393	6.4415
	7.2815	0.5197
	14.078	2.8007
	2.922	7.7619
	3.3985	1.5237
	7.4768	0.961
	23.7655	6.7618
	2.7186	8.16
	31.844	0.4412
	12	1.1601
	34.4843	1.6835
	33.4842	0.918
	10.555	2.4418
	6	1.6405
	2.8437	0.199
	14.875	0.6015
	1.3593	6.3985
	4.6018	4.039
	1.8439	2.2421
	37.281	1.4375
	0.5622	0.3593
	42.3202	3.8005
	23.117	2.9217
	19.844	1.5196
	14.875	0.7615
	10.039	0.4808
	1.883	2.9219
	13.5625	0.156
	48.6796	3.4415
	16	2
	16.836	1.082
	7.3596	2.5198
	2.5235	0.1991
	29.1954	2.4373
	6.078	0.6795
	4.4375	0.4375
	37.797	1.4375
	3.922	3.0781
	49.203	2.039
	21	0.2813
	20.922	2.3204
	14.4374	5.3203
	12.3592	2.5237
	33.961	1.4375
	0.2422	3.16
	7.8357	4.6798
	3.2811	4.762
	3.9219	7.7619
	8.164	0.2423
	13.203	0.3983
	2.242	1.3988
	4.0783	2.3592
	10	1.16
	4.1955	1.3202
	2.242	1.0783
	13.7579	0.84
	13.3595	2.039
	2.9607	8.1561
	24.922	0.125
	7.4375	4.8827
	0.961	2.6407
	33.7579	1.086
	68.8828	3.2031
	17.1643	1.8827
	2.6017	0.3988
	3.3201	2.3983
	22.1953	1.758
	2.281	3.961
	17.3202	0.3205
	9.8437	0.4376
	0.4765	4.3595
	24.844	0.7575
	12.844	0.3983
	7.2035	2.1171
	7.9609	1.3592
	3.6015	2.4845
	2.2423	0.9219
	13.3204	1.7188
	11.914	0.7575
	2.7575	0.5938
	56.7575	1.6404
	3.3203	1.6017
	22.1561	4.5937
	12.8048	1.2815
	15.0391	2.836
	13.6015	1.4842
	2.7657	0.875
	22.6405	1.797
	0.3595	3.875
	4.3671	5.6795
	1.039	0.7189
	6.3592	3.125
	3.922	3.883
	36.2035	0.5628
	6.2343	8.7657
	5.8045	2.797
	11.6795	2.039
	25.6797	2.4452
	29.5155	0.3672
	3.2812	0.6014
	16.203	2.1645
	2.3591	0.4376
	35.5157	1.7579
	10.7187	7.203
	6.844	6.281
	6.3986	5
	16.1953	0.5157
	54.961	0.4065
	12.68	1.7187
	19.117	2.4452
	7.367	1.5625
	15.6874	3.195
	4.5157	2.6408
	5.6016	1.3203
	6.9143	0.5938
	6.8046	0.3985
	10.2815	0.281
	2.4765	1.5232
	9.914	1.242
	0.2031	1.3593
	6.633	2.2422
	2.3982	1.875
	21.836	0.7267
	1.8437	0.922
	12.961	1.2423
	22.4061	1.0783
	3.4372	2.086
	12.6405	0.961
	16.32	3.5235
	6.078	1.4453
	3.9609	3.2815
	24.4843	1.4764
	26.3592	0.7577
	7.8827	3.4378
	2.922	0.7657
	11.164	3.7188
	0.5548	1.2033
	19.594	0.875
	13.5625	2.2421
	12.1561	1.4375
	23.6407	8
	20.4375	7.5622
	7.8048	2.719
	2.039	3.039
	7.836	8.1561
	25.1951	2.281
	0.4765	4.6015
	1.7185	0.1562
	4.4062	1.4455
	6.117	4
	0.6015	0.4765
	7.2033	1.7577
	3.4376	1.7579
	21.6799	1.836
	11.4375	3.8828
	9.3203	2.6015
	26.6017	1.8825
	15.078	3.6795
	40.7655	2.086
	17.406	0.1561
	18.7969	2.039
	16.9607	1.6405
	9.3986	0.2733
	1.4453	3.7188
	2	1.1563
	0.9219	0.961
	1.281	1.3204
	4.4375	0.4452
	1.6797	1.7965
	4.7188	2.281
	4.3985	0.3593
	7.117	1.961
	0.836	0.9609
	17.836	1.6795
	9	5.3595
	8.4378	1.3984
	44	0.6408
	4.0393	1.039
	5.3985	0.164
	15.1955	1.6798
	6.5155	1.3593
	4.9219	7.6797
	34.8047	0.4374
	56.8438	0.7578
	2.961	4.242
	1.4453	3
	23.281	0.4767
	7.8048	1.961
	17.3205	1.047
	0.4452	0.8045
	51.758	1.2425
	27.117	1.0781
	4.7185	1.039
	7.5548	1.5938
	5.875	2.6408
	7.2811	2.4845
	1.2812	1.5628
	11.6797	1.7189
	0.7188	2.4373
	5.8438	2.1171
	8.4845	3.047
	5.7185	1.922
	18.9141	0.4842
	4.3205	3.961
	10.1565	1.086
	0.4765	1.1173
	9	1.4764
	10.4063	2
	15.5624	4.4062
	5.2735	4.078
	14.7188	0.6797
	1.039	1.836
	1.7658	1.32
	14.4063	3.6405
	23.078	1
	4.5938	0.2813
	1.875	9.2732
	6.195	1.2815
	11.758	3.9219
	1.7188	0.797
	3.6406	0.3201
	4.4375	0.6796
	7.8439	0.4765
	15.8827	0.2425
	29.1952	0.719
	2.3595	0.758
	17.836	2.3985
	0.5625	5.6018
	27.883	2.3982
	5.203	2.2813
	11.4374	0.2812
	1.6016	1.6016
	8.7187	1.2033
	12.5235	3.039
	9.164	1.7579
	19.3201	2.4764
	9.2346	3.3202
	13.039	2.039
	5.8048	1.5545
	0.8829	1.125
	5.5156	0.242
	6.4374	1.6877
	23.2031	1.4768
	13.6408	3.6798
	1.078	4.875
	24.6407	2.6325
	17.164	2.961
	1.8045	0.5155
	7.5624	3.4452
	16.2815	1.8439
	15.4375	2.7965
	9.2815	2.242
	0.8047	3.961
	26.078	1.4762
	3.0393	3.4376
	10.3204	5
	1.8046	1.039
	8.961	0.1562
	8.3595	1.281
	8.758	0.2342
	5.8829	2.4768
	21	2.0781
	36.242	0.5625
	31.078	1.2815
	22.6015	3.5235
	1.125	0.6015
	4.4452	2.078
	8.875	1.5626
	4.6795	0.3595
	0.5622	1.6798
	17.6797	0.281
	13.6795	1.5625
	27.8048	0.7967
	25.6017	0.0785
	26.4765	1
	0.5625	2.164
	7.5622	1
	8.6015	0.1952
	3.922	0.4373
	5.086	4.4843
	8	1
	0.2346	0.3595
	0.9219	1.2811
	7.7578	0.4373
	4.8439	3.125
	33.203	6.2422
	31.5627	5.5235
	6.32	1.6405
	20.4765	1.953
	7.8355	0.7185
	1.758	0.914
	1.5236	4.4377
	11.7578	4.8825
	25.4375	1.6018
	5.242	0.4062
	25.3205	3.6795
	5.039	0.4765
	6.7579	2.961
	0.719	0.4376
	14.922	3.6018
	0.4375	5.5628
	30.445	4.3985
	10.7265	3.6325
	7.4455	1.164
	14.4455	0.5548
	14.9219	1.4373
	1.8829	5.3982
	3.039	1.164
	11.164	0.4062
	15.961	3
	11.594	1.3205
	2.6017	1.4455
	17.0783	3.8829
	0.9605	3.4376
	4.5545	5.3672
	9.6015	1.6407
	17.4767	0.7658
	5.2422	0.7189
	4.3593	9.1563
	25.039	2.203
	8.6014	1.1563
	2.914	1.6795
	16.7579	2.875
	13	2.6795
	0.7264	1.8437
	5.5233	0.3205
	6.2031	2.039
	9.9219	3.3986
	23.2345	6.4843
	4.3205	0.3592
	9.8439	0.8827
	19.039	0.875
	26.4455	1.5232
	19.4373	1.836
	21	2.5622
	2.3985	8.4455
	25.7969	0.5628
	33.3594	1.0391
	6.875	0.2815
	7.6798	1.3592
	5.961	0.4375
	7.9531	7.039
	14.3984	1.4845
	21.922	1.719
	2.2815	0.875
	25.1955	0.2733
	21.8359	0.3203
	9.4764	4.164
	30.2423	0.7189
	1.203	6.3203
	9.2812	1.1953
		1.8438
		1.7188
		6.4375
		0.5625
		0.3983
		5.9607
		1.3595
		0.3203
		3.8045
		1.844
		1.3203
		0.7577
		1
		1.7575
		3.961
		7.2811
		5.039
		1.281
		2.5158
		4.7579
		3.5548
		2.5545
		0.5628
		0.2811
		0.4375
		3.4843
		4.8435
		5.1562
		3.914
		7.7969
		1.2421
		0.875
		6.4455
		0.2733
		0.6797
		2.6408
		0.4378
		1.7965
		0.3982
		16.9219
		0.5547
		0.8439
		4
		1.961
		4.1641
		5.1173
		1
		5.8827
		1.8435
		1.8047
		3.125
		3.1173
		0.4765
		0.8438
		0.203
		0.7969
		2.1171
		0.4452
		1.3205
		2.1562
		1.4374
		1.3596
		4.961
		3.203
		4.8047
		5.5625
		2.4376
		2.5545
		2.4453
		1.3595
		3
		1.4846
		1.078
		0.281
		2.6015
		3.2421
		2.5158
		3.961
		2.078
		1.2345
		0.961
		0.2345
		1.2814
		1.836
		0.1171
		0.5625
		1.8828
		2.4375
		2.5624
		0.3202
		2.242
		0.3988
		1.4764
		0.922
		2.1952
		1.6017
		1.3204
		4.7189
		1.242
		1.0395
		0.1175
		0.5236
		0.7969
		0.6795
		5
		1.078
		1.8435
		8.922
		1.3595
		1.2815
		0.3596
		2.6407
		4.078
		2.875
		0.6799
		2.039
		0.922
		4
		0.3594
		2.7965
		1.3982
		0.4845
		2.3205
		0.4375
		7.4842
		1.2813
		0.8828
		2.1561
		3.3594
		0.5155
		1
		2.3595
		0.3983
		1.6015
		0.125
		6.5625
		0.1175
		9.5624
		5.203
		0.9219
		2.3592
		5.5547
		1.3985
		1.117
		0.4455
		0.8827
		4.961
		2.5624
		1.5238
		1.883
		5.164
		0.5158
		5.9219
		4.6796
		0.5625
		5.7655
		1.875
		2.3983
		1.6797
		2.2425
		0.4453
		0.5155
		1.961
		2.6798
		1.883
		2.3595
		0.5626
		2.7188
		2.3202
		4.1172
		0.6406
		2.1171
		5.3985
		1.6407
		0.32
		1.3982
		6.6796
		2
		0.3203
		0.4766
		0.922
		6.0391
		5.039
		1.6017
		0.4845
		2.203
		8.7577
		5.5233
		0.4843
		2.2031
[truncated: 855 more rows]
