# Supplementary material for: Activation of the archaeal ion channel MthK is exquisitely regulated by temperature
Source: eLife. 2020 Dec 4;9:e59055. doi: 10.7554/eLife.59055 (PMC7717905; doi:10.7554/eLife.59055)
Supplement: Figure 4—figure supplement 1—source data 1. [file elife-59055-fig4-figsupp1-data1.xlsx]

## Sheet: Sheet1
	21C			37C
Ca	Po	SEM	n	Po	SEM	n
0.1	0.0071	0.0032	5	0.1091	0.0292	4
0.2	0.0349	0.0163	3	0.1818	0.0144	3
0.5	0.0931	0.0248	5	0.2717	0.03	4
1	0.396	0.0873	6	0.4444	0.0168	3
2	0.434	0.1012	4	0.4857	0.0791	4
5	0.4305	0.0152	4	0.5253	0.0651	3
10	0.475	0.022	5	0.5534	0.0331	3
	21C			37C
	Hill fitting
start	0.00769	0.11682
end	0.4454	0.55583
K	0.70805	0.58232
n	3.84133	1.82046
	21C	37C
Ca concentration	Recording 1	Recording 2	Recording 3	Recording 4	Recording 5	Recording 6
0.1	0.00301872	0.006632	0.00340393	0.018423	0.0038288			21C
0.2	0.0508093	0.00231209	0.0515
0.5	0.148793	0.0182228	0.092535	0.144098	0.061734
1	0.348333	0.442526	0.272289	0.225788	0.282688	0.804497
2	0.239835	0.669153	0.53298	0.29263
5	0.475831	0.412024	0.415631	0.41832
10	0.540401	0.511697	0.424586	0.439453	0.458659
0.1	0.119768	0.066912	0.06212	0.18743				37C
0.2	0.153867	0.201996	0.1896
0.5	0.23297	0.361338	0.24675	0.245818
1	0.473401	0.415079	0.444796
2	0.337924	0.606624	0.360667	0.63754
5	0.553849	0.621253	0.400974
10	0.6184	0.509874	0.5318
