# Supplementary material for: Activation of the archaeal ion channel MthK is exquisitely regulated by temperature
Source: eLife. 2020 Dec 4;9:e59055. doi: 10.7554/eLife.59055 (PMC7717905; doi:10.7554/eLife.59055)
Supplement: Figure 4—source data 1. [file elife-59055-fig4-data1.xlsx]

## Sheet: Sheet1
Ca	21C			n	37C			n
0.1	-4.946	0.38	0.614	5	-2.1	0.271	0.344	4
0.2	-3.321	0.4	0.646	3	-1.504	0.094	0.1	3
0.5	-2.277	0.264	0.337	5	-0.986	0.147	0.158	4
1	-0.422	0.355	0.384	6	-0.223	0.068	0.068	3
2	-0.267	0.406	0.43	4	-0.057	0.318	0.321	4
5	-0.28	0.062	0.062	4	0.102	0.265	0.261	3
10	-0.1	0.088	0.089	5	0.214	0.135	0.133	3
	ln (Po/Pc)	Error +	Error -		ln (Po/Pc)	Error +	Error -
	Hill fitting
start	0.00769	0.11682
end	0.4454	0.55583
K	0.70805	0.58232
n	3.84133	1.82046
	21C	37C
X-	-4.86011	-2.02289
X+	-0.219274	0.224255
delta x	4.64084	2.24715
R
1.9872*10e-3
delta G	2.71135	1.38432
