# Supplementary material for: Activation of the archaeal ion channel MthK is exquisitely regulated by temperature
Source: eLife. 2020 Dec 4;9:e59055. doi: 10.7554/eLife.59055 (PMC7717905; doi:10.7554/eLife.59055)
Supplement: Figure 5—figure supplement 1—source data 1. [file elife-59055-fig5-figsupp1-data1.xlsx]

## Sheet: Sheet1
L0	0.1		thetaUO	8		thetaBO	150		netatheta	42.1875
Kb	20		thetaUC	18		thetaBC	8
Hill Plot = ln(po/1-po)													Po
Instance 1	L0 heat sensitive												Instance 1	L0 heat sensitive
dH	60000												dH	60000
dS	200												dS	200
	T(K)													T(K)
	293	295	297	299	301	303	305	307	309	311	313			293	295	297	299	301	303	305	307	309	311	313
Value of parameter	0.562867	0.665161	0.784281	0.922697	1.0832	1.26893	1.48343	1.73066	2.01507	2.34163	2.7159		Value of parameter	0.562867	0.665161	0.784281	0.922697	1.0832	1.26893	1.48343	1.73066	2.01507	2.34163	2.7159
Ca conc													Ca conc
1e-05	-1.38199	-1.215	-1.05026	-0.88773	-0.727356	-0.5691	-0.412919	-0.258772	-0.106621	0.0435725	0.191847		1e-05	0.20069	0.228817	0.259174	0.291578	0.325775	0.361445	0.398213	0.435666	0.47337	0.510891	0.547815
3e-05	-1.37472	-1.20774	-1.043	-0.880464	-0.72009	-0.561833	-0.405652	-0.251506	-0.099355	0.0508389	0.199113		3e-05	0.201858	0.230102	0.260572	0.293082	0.327373	0.363123	0.399955	0.437453	0.475182	0.512707	0.549615
9e-05	-1.35325	-1.18626	-1.02152	-0.858991	-0.698617	-0.540361	-0.384179	-0.230033	-0.0778823	0.0723116	0.220586		9e-05	0.20534	0.233928	0.26473	0.29755	0.332119	0.368104	0.405119	0.442744	0.480539	0.51807	0.554924
0.00027	-1.29159	-1.12461	-0.959869	-0.797336	-0.636962	-0.478705	-0.322524	-0.168378	-0.0162268	0.133967	0.282242		0.00027	0.215583	0.245158	0.276904	0.310596	0.345934	0.382558	0.420061	0.458005	0.495943	0.533442	0.570096
0.00081	-1.12757	-0.960585	-0.795848	-0.633314	-0.47294	-0.314683	-0.158502	-0.00435589	0.147795	0.297989	0.446263		0.00081	0.244609	0.276761	0.310914	0.34676	0.383921	0.421972	0.460457	0.498911	0.536882	0.573951	0.60975
0.00243	-0.759255	-0.592268	-0.427531	-0.264997	-0.104623	0.0536336	0.209815	0.363961	0.516112	0.666306	0.81458		0.00243	0.318808	0.356115	0.394716	0.434136	0.473868	0.513405	0.552262	0.589999	0.626238	0.660675	0.693085
0.00729	-0.131016	0.0359703	0.200708	0.363242	0.523616	0.681872	0.838053	0.9922	1.14435	1.29454	1.44282		0.00729	0.467293	0.508992	0.550009	0.589825	0.627993	0.664156	0.698055	0.729522	0.758478	0.784915	0.808891
0.02187	0.656053	0.82304	0.987777	1.15031	1.31068	1.46894	1.62512	1.77927	1.93142	2.08161	2.22989		0.02187	0.658373	0.694881	0.728649	0.759568	0.787628	0.812896	0.8355	0.855607	0.873406	0.889103	0.902902
0.06561	1.39765	1.56463	1.72937	1.89191	2.05228	2.21054	2.36672	2.52086	2.67302	2.82321	2.97148		0.06561	0.80181	0.827017	0.849332	0.868973	0.886178	0.901192	0.914254	0.925592	0.935415	0.943917	0.951269
0.19683	1.91787	2.08486	2.24959	2.41213	2.5725	2.73076	2.88694	3.04109	3.19324	3.34343	3.49171		0.19683	0.871901	0.889423	0.904616	0.917747	0.929071	0.938817	0.947197	0.954396	0.960579	0.965889	0.970451
0.59049	2.1866	2.35358	2.51832	2.68086	2.84123	2.99949	3.15567	3.30981	3.46196	3.61216	3.76043		0.59049	0.899039	0.913219	0.925416	0.935887	0.944864	0.952551	0.959131	0.964764	0.969586	0.973716	0.977256
1.77147	2.29641	2.4634	2.62814	2.79067	2.95105	3.1093	3.26548	3.41963	3.57178	3.72197	3.87025		1.77147	0.90858	0.921536	0.932651	0.94217	0.950313	0.957275	0.963226	0.968312	0.972663	0.976385	0.979573
5.31441	2.33604	2.50302	2.66776	2.83029	2.99067	3.14892	3.30511	3.45925	3.6114	3.7616	3.90987		5.31441	0.911818	0.924353	0.935097	0.944291	0.952151	0.958866	0.964604	0.969506	0.973697	0.977282	0.980351
15.9432	2.34962	2.5166	2.68134	2.84388	3.00425	3.16251	3.31869	3.47283	3.62498	3.77518	3.92345		15.9432	0.912904	0.925298	0.935917	0.945001	0.952766	0.959399	0.965064	0.969905	0.974042	0.977581	0.980611
47.8297	2.35419	2.52117	2.68591	2.84845	3.00882	3.16708	3.32326	3.4774	3.62955	3.77975	3.92802		47.8297	0.913267	0.925613	0.93619	0.945238	0.952971	0.959576	0.965218	0.970038	0.974158	0.977681	0.980697
143.489	2.35572	2.5227	2.68744	2.84997	3.01035	3.1686	3.32479	3.47893	3.63108	3.78128	3.92955		143.489	0.913388	0.925718	0.936281	0.945317	0.953039	0.959636	0.965269	0.970082	0.974196	0.977714	0.980726
430.467	2.35623	2.52321	2.68795	2.85048	3.01086	3.16911	3.3253	3.47944	3.63159	3.78179	3.93006		430.467	0.913428	0.925753	0.936312	0.945344	0.953062	0.959655	0.965286	0.970097	0.974209	0.977726	0.980736
L0	0.1		thetaUO	8		thetaBO	150		netatheta	42.1875
Kb	20		thetaUC	18		thetaBC	8
Hill Plot = ln(po/1-po)													Po
Instance 2	Kb heat sensitive												Instance 2	Kb heat sensitive
dH	60000												dH	60000
dS	220												dS	220
	T(K)													T(K)
	293	295	297	299	301	303	305	307	309	311	313			293	295	297	299	301	303	305	307	309	311	313
Value of parameter	6.2393	7.37323	8.69365	10.228	12.0071	14.066	16.4436	19.1842	22.3368	25.9567	30.1054		Value of parameter	6.2393	7.37323	8.69365	10.228	12.0071	14.066	16.4436	19.1842	22.3368	25.9567	30.1054
Ca conc													Ca conc
1e-05	-3.11237	-3.11217	-3.11193	-3.11164	-3.11132	-3.11094	-3.11051	-3.11001	-3.10944	-3.10878	-3.10802		1e-05	0.0425997	0.0426082	0.042618	0.0426295	0.0426427	0.0426581	0.0426758	0.0426962	0.0427197	0.0427467	0.0427776
3e-05	-3.1101	-3.10947	-3.10875	-3.10791	-3.10694	-3.10582	-3.10453	-3.10304	-3.10133	-3.09937	-3.09712		3e-05	0.0426928	0.0427181	0.0427476	0.042782	0.0428217	0.0428677	0.0429209	0.0429821	0.0430526	0.0431334	0.043226
9e-05	-3.10329	-3.10144	-3.0993	-3.09681	-3.09394	-3.09062	-3.0868	-3.08242	-3.07741	-3.07168	-3.06516		9e-05	0.0429717	0.0430477	0.0431362	0.043239	0.0433581	0.0434959	0.0436549	0.0438382	0.0440488	0.0442905	0.0445673
0.00027	-3.08317	-3.07775	-3.07149	-3.06426	-3.05594	-3.04641	-3.03552	-3.02313	-3.00906	-2.99316	-2.97527		0.00027	0.043807	0.0440343	0.0442988	0.0446059	0.0449615	0.0453725	0.0458465	0.046392	0.0470182	0.0477356	0.0485558
0.00081	-3.02522	-3.01002	-2.99262	-2.9728	-2.95032	-2.92495	-2.89648	-2.8647	-2.82942	-2.79048	-2.74776		0.00081	0.0462992	0.0469751	0.0477602	0.04867	0.0497215	0.0509337	0.0523277	0.0539263	0.0557548	0.0578406	0.0602132
0.00243	-2.87003	-2.83181	-2.78917	-2.74196	-2.69003	-2.63336	-2.57195	-2.50591	-2.43538	-2.36062	-2.28191		0.00243	0.0536549	0.0556292	0.057912	0.0605426	0.063564	0.0670221	0.0709655	0.0754452	0.080514	0.0862252	0.0926319
0.00729	-2.51681	-2.44007	-2.35816	-2.27147	-2.18044	-2.08559	-1.98749	-1.88673	-1.78389	-1.67959	-1.5744		0.00729	0.074688	0.0801677	0.0864192	0.0935138	0.101521	0.110505	0.120522	0.131618	0.143823	0.15715	0.171589
0.02187	-1.90305	-1.79058	-1.67623	-1.56077	-1.44494	-1.32947	-1.21501	-1.10219	-0.99159	-0.883717	-0.779041		0.02187	0.129763	0.143001	0.157595	0.173536	0.190781	0.209247	0.228815	0.249329	0.270598	0.292408	0.314527
0.06561	-1.12017	-0.998657	-0.880314	-0.765761	-0.655541	-0.550114	-0.44986	-0.355072	-0.265955	-0.182632	-0.105141		0.06561	0.24598	0.269206	0.293113	0.317397	0.341742	0.365838	0.389394	0.412153	0.4339	0.454469	0.473739
0.19683	-0.369907	-0.271537	-0.180061	-0.0955457	-0.0179469	0.0528802	0.117167	0.175218	0.227389	0.274077	0.315699		0.19683	0.408564	0.43253	0.455106	0.476132	0.495513	0.513217	0.529258	0.543693	0.556604	0.568093	0.578276
0.59049	0.166307	0.224189	0.275485	0.320733	0.360485	0.395288	0.425671	0.452133	0.475138	0.495108	0.512428		0.59049	0.541481	0.555814	0.568439	0.579503	0.589158	0.597555	0.604839	0.611146	0.616599	0.621309	0.625375
1.77147	0.448131	0.473748	0.495702	0.514492	0.530561	0.544295	0.556034	0.566069	0.574651	0.581995	0.588284		1.77147	0.610195	0.61627	0.621449	0.625859	0.629614	0.632811	0.635534	0.637856	0.639836	0.641526	0.642971
5.31441	0.564562	0.574136	0.582211	0.589029	0.594791	0.599667	0.603797	0.607303	0.610281	0.612816	0.614977		5.31441	0.637508	0.639717	0.641576	0.643142	0.644464	0.64558	0.646525	0.647325	0.648005	0.648583	0.649075
15.9432	0.606778	0.610103	0.612891	0.615232	0.617202	0.618863	0.620266	0.621454	0.62246	0.623315	0.624043		15.9432	0.647205	0.647964	0.6486	0.649133	0.649582	0.64996	0.650279	0.650549	0.650778	0.650972	0.651138
47.8297	0.621276	0.6224	0.62334	0.624129	0.624791	0.625349	0.62582	0.626218	0.626555	0.626841	0.627084		47.8297	0.650509	0.650764	0.650978	0.651157	0.651307	0.651434	0.651541	0.651631	0.651708	0.651773	0.651828
143.489	0.626158	0.626535	0.626849	0.627113	0.627335	0.627521	0.627678	0.627811	0.627924	0.628019	0.6281		143.489	0.651618	0.651703	0.651775	0.651835	0.651885	0.651927	0.651963	0.651993	0.652018	0.65204	0.652059
430.467	0.627791	0.627917	0.628022	0.62811	0.628184	0.628246	0.628298	0.628343	0.62838	0.628412	0.628439		430.467	0.651988	0.652017	0.652041	0.652061	0.652078	0.652092	0.652104	0.652114	0.652122	0.652129	0.652135
