# Supplementary material for: Activation of the archaeal ion channel MthK is exquisitely regulated by temperature
Source: eLife. 2020 Dec 4;9:e59055. doi: 10.7554/eLife.59055 (PMC7717905; doi:10.7554/eLife.59055)
Supplement: Figure 5—figure supplement 3—source data 1. [file elife-59055-fig5-figsupp3-data1.xlsx]

## Sheet: Figure 1
37C	no blocker							24C	no blocker
Construct	OD600 (5 times dilution)	Real OD	Average	SD	SEM			Construct	OD600 (2 times dilution)	Real OD	Average	SD	SEM
WT-1	0.237	1.185	1.27125	0.158186	0.0790932			WT-1	0.418	0.836	0.948	0.097509	0.0562968
WT-2	0.246	1.23						WT-2	0.507	1.014
WT-3	0.301	1.505						WT-3	0.497	0.994
WT-4	0.233	1.165						IR-1	0.426	0.852	1.0465	0.182365	0.0911825
IR-1	0.326	1.63	1.7975	0.356008	0.178004			IR-2	0.465	0.93
IR-2	0.31	1.55						IR-3	0.602	1.204
IR-3	0.465	2.325						IR-4	0.6	1.2
IR-4	0.337	1.685						DeltaC-1		0.425	0.40975	0.0208547	0.0104273
DeltaC -1		0.359	0.316	0.0425088	0.0245425			DeltaC-2		0.43
DeltaC -2		0.274						DeltaC-3		0.396
DeltaC -3		0.315						DeltaC-4		0.388
PQE-1		0.176	0.228333	0.0708825	0.040924			PQE-1		0.334	0.3612	0.0677732	0.0303091
PQE-2		0.2						PQE-2		0.358
PQE-3		0.309						PQE-3		0.34
								PQE-4		0.476
								PQE-5		0.298
37C (no blocker) versus 24C (no blocker)
Null Hypothesis	Mean1-Mean2 =0
Probability > t	MthK FL	MthK IR	MthK DeltaC	Empty vector
Equal variance assumed	0.0273	0.00945	0.01125	0.03836
Non equal variance assumed	0.02132	0.01622	0.04531	0.05707

## Sheet: Figure 1-figure supplement 1
37C	no blocker							24C	no blocker
Construct	OD600 (5 times dilution)	Real OD	Average	SD	SEM			Construct	OD600 (2 times dilution)	Real OD	Average	SD	SEM
WT-1	0.237	1.185	1.27125	0.158186	0.0790932			WT-1	0.418	0.836	0.948	0.097509	0.0562968
WT-2	0.246	1.23						WT-2	0.507	1.014
WT-3	0.301	1.505						WT-3	0.497	0.994
WT-4	0.233	1.165						IR-1	0.426	0.852	1.0465	0.182365	0.0911825
IR-1	0.326	1.63	1.7975	0.356008	0.178004			IR-2	0.465	0.93
IR-2	0.31	1.55						IR-3	0.602	1.204
IR-3	0.465	2.325						IR-4	0.6	1.2
IR-4	0.337	1.685						DeltaC-1		0.425	0.40975	0.0208547	0.0104273
DeltaC -1		0.359	0.316	0.0425088	0.0245425			DeltaC-2		0.43
DeltaC -2		0.274						DeltaC-3		0.396
DeltaC -3		0.315						DeltaC-4		0.388
PQE-1		0.176	0.228333	0.0708825	0.040924			PQE-1		0.334	0.3612	0.0677732	0.0303091
PQE-2		0.2						PQE-2		0.358
PQE-3		0.309						PQE-3		0.34
								PQE-4		0.476
								PQE-5		0.298
37C	with blocker							24C	with blocker
Construct	Real OD	Average	SD	SEM				Construct	Real OD	Average	SD	SEM
WT-1	0.23	0.40275	0.153713	0.0768563				WT-1	0.521	0.53775	0.0286749	0.0143375
WT-2	0.355							WT-2	0.507
WT-3	0.428							WT-3	0.569
WT-4	0.598							WT-4	0.554
IR-1	0.328	0.39075	0.0528859	0.0264429				IR-1	0.548	0.5955	0.0505338	0.0252669
IR-2	0.374							IR-2	0.621
IR-3	0.408							IR-3	0.559
IR-4	0.453							IR-4	0.654
DeltaC -1	0.34	0.355667	0.0146401	0.00845248				DeltaC-1	0.577	0.48225	0.0743432	0.0371716
DeltaC -2	0.369							DeltaC-2	0.426
DeltaC -3	0.358							DeltaC-3	0.506
PQE-1	0.291	0.253	0.0445309	0.0257099				DeltaC-4	0.42
PQE-2	0.264							pQE	0.263	0.3172	0.0602802	0.0269581
PQE-3	0.204								0.27
									0.35
									0.406
									0.297
37C (no blocker) versus 37C (blocker)							24C (no blocker) versus 24C (blocker)							37C (blocker) versus 24C (blocker)
Null Hypothesis	Mean1-Mean2 =0						Null Hypothesis	Mean1-Mean2 =0						Null Hypothesis	Mean1-Mean2 =0
Probability > t	MthK FL	MthK IR	MthK DeltaC	Empty vector			Probability > t	MthK FL	MthK IR	MthK DeltaC	Empty vector			Probability > t	MthK FL	MthK IR	MthK DeltaC	Empty vector
Equal variance assumed	0.000222006	0.000231269	0.2012	0.63666			Equal variance assumed	0.000440293	0.00311	0.10947	0.42163			Equal variance assumed	0.13496	0.00311	0.03618	0.16448
Non equal variance assumed	0.000222914	0.00373	0.24264	0.6414			Non equal variance assumed	0.01388	0.01261	0.14445	0.42404			Non equal variance assumed	0.17669	0.01261	0.03904	0.14013

## Sheet: Figure 1-figure supplement 2
1.5 mM Ca
Temperature	03_17	03_17_02	2017 03 20	20170321	Average	SEM
18	0.164321	0.170758	0.0831829	0.106676	0.131235	0.0215424
23	0.199114	0.227173	0.135781	0.263615	0.206421	0.0269957
28.5	0.311702	0.355998	0.265488	0.511315	0.361126	0.0533639
35	0.451264	0.551302	0.665372	0.75947	0.606852	0.0670883
42.5	1	1	1	1	1	0
0.3 mM Ba							Temperature	Fitted	SEM
Temperature	20170317	20170315	20170321	Average	SEM		18	0.109	0.0151736
22	0.146729	0.170772	0.1649	0.160801	0.00723702		23	0.169	0.0151736
23.5	0.173312	0.190403	0.173423	0.179046	0.00567844		28.5	0.235	0.0151736
29	0.224474	0.257724	0.212049	0.231416	0.0136345		35	0.313	0.0151736
38	0.421562	0.333596	0.309103	0.354754	0.0341443		42.5	0.403	0.0151736
Temperature	Baseline subtracted	SEM
18	0.0222345	0.0263498
23	0.0374207	0.0309678
28.5	0.126126	0.0554792
35	0.293852	0.0687829
42.5	0.597	0.0151736

## Sheet: Figure 2
Temperature	open dwell time	SDM	n	Unitary .Conductance	SDM	n	Open probability	SDM	median	n	median
21	8.45	1.47	10	128.3	19.5	10	0.009	0.002	0.00523	10
26	7.74	1.68	4	127.5	32.9	4	0.004	0.002	0.00359	4
32	8.18	2.11	4	105.4	40.6	4	0.005	0.002	0.00546	4
37	4.99	1.34	5	173.1	25.4	5	0.101	0.024	0.0707	5
	open probability individual values
	21	26	32	37
	0.003019	0.000381	0.001388	0.119768
	0.006632	0.0084	0.002996	0.066912
	0.003404	0.00293	0.009173	0.06212
	0.018423	0.00424	0.00793	0.0707
	0.003829			0.18743
	0.020554
	0.00744
	0.021678
	0.00273
	0.000918

## Sheet: Figure 2-figure supplement 1
Gel filtration
Volume (ml)	UV
8.99526	161.716
9.01925	161.686
9.04324	161.91
9.06723	162.305
9.09121	162.888
9.1152	163.696
9.13919	164.639
9.16318	165.765
9.18716	167.043
9.21115	168.431
9.23514	169.935
9.25912	171.568
9.28311	173.246
9.3071	174.963
9.33109	176.702
9.35507	178.476
9.37906	180.185
9.40305	181.894
9.42704	183.599
9.45102	185.219
9.47501	186.815
9.499	188.393
9.52299	189.973
9.54697	191.606
9.57096	193.29
9.59495	195.088
9.61894	197.067
9.64292	199.269
9.66691	201.702
9.6909	204.431
9.71488	207.543
9.73887	211.045
9.76286	214.904
9.78685	219.205
9.81083	224.002
9.83482	229.162
9.85881	234.827
9.8828	241.009
9.90678	247.693
9.93077	254.928
9.95476	262.833
9.97875	271.39
10.0027	281.277
10.0267	291.946
10.0507	303.726
10.0747	317.139
10.0987	332.123
10.1227	348.67
10.1467	367.084
10.1706	387.477
10.1946	409.868
10.2186	433.876
10.2426	459.29
10.2666	486.078
10.2906	514.351
10.3146	543.271
10.3386	572.636
10.3625	603.078
10.3865	632.948
10.4105	662.168
10.4345	690.319
10.4585	717.548
10.4825	741.687
10.5065	763.175
10.5305	781.312
10.5544	795.452
10.5784	805.138
10.6024	809.597
10.6264	808.874
10.6504	802.575
10.6744	790.915
10.6984	774.26
10.7224	752.482
10.7463	726.664
10.7703	697.117
10.7943	665.658
10.8183	632.834
10.8423	598.958
10.8663	565.928
10.8903	534.566
10.9142	504.543
10.9382	477.278
10.9622	453.641
10.9862	432.725
11.0102	415.103
11.0342	399.918
11.0582	387.249
11.0822	376.821
11.1061	368.035
11.1301	360.148
11.1541	353.303
11.1781	346.943
11.2021	340.616
11.2261	334.066
11.2501	327.486
11.2741	320.464
11.298	313.001
11.322	305.149
11.346	296.808
11.37	288.166
11.394	279.232
11.418	270.037
11.442	260.738
11.466	251.411
11.49	241.903
11.5139	232.708
11.5379	223.654
11.5619	214.945
11.5859	206.421
11.6099	198.142
11.6339	190.353
11.6579	182.951
11.6819	175.791
11.7058	169.135
11.7298	162.904
11.7538	156.963
11.7778	151.564
11.8018	146.354
11.8258	141.543
11.8498	137.104
11.8737	132.967
11.8977	129.068
11.9217	125.556
11.9457	122.268
11.9697	119.157
11.9937	116.352

## Sheet: Figure 2- figure supplement 2
x	y		Fitted line			Fitted statistic
Bin center	sqrt(count)		x	y		file name	fit function	Best number	P1	S.E.	tau1	s.e.	P2	S.E.	tau2	s.e.	P3	S.E.	tau3	s.e.	Intercept	correlation	standard deviation	sum of the squared error
-0.9	11.4017		-0.9	8.44953		Results1	Exponential, log probability, 3rd Order	3	36.1244	4.03439	0.602237	0.13479	59.9888	10.975	3.8681	0.194225	42.9855	12.6708	12.382	0.197848	26.5776	0.891521	2.47196	250.533
-0.83333	11.7047		-0.87239	8.91055
-0.76667	0		-0.84478	9.39058
-0.7	13		-0.81717	9.88961
-0.63333	13.8203		-0.78956	10.4075
-0.56667	16.8819		-0.76195	10.9441
-0.5	17.1464		-0.73434	11.4988
-0.43333	23.9583		-0.70673	12.0713
-0.36667	16.6733		-0.67912	12.6606
-0.3	23.1517		-0.65152	13.2659
-0.23333	26.9073		-0.62391	13.886
-0.16667	20.7605		-0.5963	14.5196
-0.1	28.2843		-0.56869	15.165
-0.03333	23.3452		-0.54108	15.8204
0.03333	24.1247		-0.51347	16.4836
0.1	26.8887		-0.48586	17.1524
0.16667	27.7849		-0.45825	17.8242
0.23333	28.8964		-0.43064	18.496
0.3	29.1376		-0.40303	19.165
0.36667	30.348		-0.37542	19.8277
0.43333	31.5119		-0.34781	20.4809
0.5	31.289		-0.3202	21.121
0.56667	32.9393		-0.29259	21.7445
0.63333	32.5576		-0.26498	22.3479
0.7	33.0303		-0.23737	22.9276
0.76667	31.5119		-0.20976	23.4804
0.83333	30.1496		-0.18216	24.0033
0.9	28.1425		-0.15455	24.4938
0.96667	28.3725		-0.12694	24.9496
1.03333	26.7769		-0.09933	25.3694
1.1	24.3926		-0.07172	25.7523
1.16667	21.4243		-0.04411	26.0984
1.23333	18.735		-0.0165	26.4086
1.3	16.0624		0.01111	26.6849
1.36667	13.8924		0.03872	26.9301
1.43333	10.198		0.06633	27.1482
1.5	7.61577		0.09394	27.344
1.56667	6.16441		0.12155	27.5231
1.63333	4.12311		0.14916	27.6919
1.7	2.82843		0.17677	27.8571
1.76667	2.82843		0.20438	28.0256
1.83333	1		0.23199	28.2044
			0.2596	28.3997
			0.28721	28.617
			0.31481	28.8605
			0.34242	29.1329
			0.37003	29.4348
			0.39764	29.765
			0.42525	30.1199
			0.45286	30.4937
			0.48047	30.8783
			0.50808	31.264
			0.53569	31.6392
			0.5633	31.9915
			0.59091	32.3076
			0.61852	32.5743
			0.64613	32.7788
			0.67374	32.9093
			0.70135	32.9553
			0.72896	32.9082
			0.75657	32.7615
			0.78417	32.5108
			0.81178	32.154
			0.83939	31.6916
			0.867	31.1261
			0.89461	30.4626
			0.92222	29.7077
			0.94983	28.8701
			0.97744	27.9601
			1.00505	26.9887
			1.03266	25.9681
			1.06027	24.9102
			1.08788	23.8271
			1.11549	22.7301
			1.1431	21.6292
			1.17071	20.5329
			1.19832	19.448
			1.22593	18.3791
			1.25354	17.329
			1.28114	16.2986
			1.30875	15.2872
			1.33636	14.2934
			1.36397	13.3148
			1.39158	12.3494
			1.41919	11.3959
			1.4468	10.4537
			1.47441	9.52423
			1.50202	8.61013
			1.52963	7.7159
			1.55724	6.84741
			1.58485	6.01162
			1.61246	5.21601
			1.64007	4.4681
			1.66768	3.77479
			1.69529	3.14185
			1.7229	2.57354
			1.75051	2.07222
			1.77812	1.63829
			1.80572	1.27015
			1.83333	0.96442

## Sheet: Figure 2-figure supplement 3
	21C-Pre heating	38C	21C post-heating
Patch 1	0.0205	0.042	3.28e-05
Patch 2	0.0074	0.17	0.0435
Patch 3	0.0217	0.146	0.0245
Patch 4	0.0027	0.081	3.6e-05
Patch 5	0.0009	0.157	0.0001962
Average	0.01064	0.1192	0.013653
SEM	0.00402053	0.022497	0.0080636
median	0.0074	0.146	0.0001962

## Sheet: Figure 3
				Fig 3C
					open dwell time	SEM	n	unitary conductance	SEM	n
Fig 3B	Open dwell time (ms)			21C	18.54	7.83	5	164.4	17.2	5
Temperature	20	36		37C	5.41	1.93	5	227.7	24.9	5
	3.5201	0.28
	3.36	0.48
	2.36	9.2
	16.08	0.48
	1.2	1.32
	3.56	3.64
	8.08	2.08
	44.0799	1.52
	31.08	2.4
	28.44	3.08
	7.64	1.6
	48.0799	2.88
	8.9599	0.48
	9	1.24
	26.04	3.08
	2.7601	0.32
	0.0801	0.48
	29.44	3.08
	11.4	1.76
	3.3999	0.7199
	7.4001	0.6799
	4.76	1.96
	3.5601	5.04
	5.4799	0.44
	6.3198	1.72
	6.2001	3.72
	11.08	0.08
	15.68	2.1199
	0.16	1.64
	15.0798	0.6001
	7.2802	0.64
	0.8	0.1599
	16.48	0.92
	26.8799	2.5199
	27.72	0.3599
	16.3202	0.28
	17.2399	0.2
	4.2801	4.4399
	6.4402	0.7999
	4.32	3.52
	4.8398	1.64
	19.92	2.16
	17	1.32
	7.3602	0.3599
	45.6799	2.08
	9.7599	1.8401
	19	0.32
	38.8799	0.8
	11.04	1.28
	13.6798	10.48
	2.1201	1.8801
	3.24	3.04
	5.2799	0.1201
	12.36	1.9601
	5.3198	0.0801
	14.3599	4.2401
	17.6001	1.9199
	7.6799	2.16
	4.0801	0.3599
	1.2802	1.7601
	23.2002	2.16
	9.7201	2.6802
	10.08	1.24
	0.3999	1.2001
	7.3599	0.96
	2.72	1.7599
	18.3999	5.2799
	38.3198	0.3999
	3.3599	1.52
	8.7602	1.2798
	7.64	0.28
	9.9199	0.4399
	4.3999	1.5598
	3.92	0.92
	1.08	2.2399
	0.76	4.1601
	42.8399	1.8399
	3.16	3.16
	8.04	4.0801
	3.2403	0.56
	16.8398	0.1598
	13.159	1.44
	8.12	0.9599
	51.4394	2.36
	4.8395	0.52
	5	4.8402
	7.2001	1.6
	5.84	1.3599
	0.5205	1.6799
	4.0803	2.7198
	2.2795	2.92
	22.7595	3.3602
	1.2003	1.72
	16.6398	0.52
	10.3605	1.6001
	2.6407	1.48
	5.4805	0.6
	18.2001	1.24
	2.801	3.64
	3.1602	0.5201
	6.96	0.7198
	14.96	0.9199
	7.5998	3.6401
	31.96	0.5998
	12.3995	0.3999
	14.6407	2.3599
	0.3605	0.6802
	17.5998	0.2401
	12.8399	1.28
	14.7597	1.2399
	14.3602	3.9199
	4.4005	0.7998
	4.96	0.56
	10.6798	0.3602
	11.5205	1.52
	0.6407	1.48
	10.5598	1.68
	14.2793	2.8799
	0.721	4.6802
	2.7595	6.3599
	19.84	3.8802
	17.6807	0.2401
	36.5193	2
	13.7597	0.08
	5.5602	0.12
	18.3995	0.84
	4.4406	3.1601
	34.641	2.28
	2.6398	0.9602
	14.7198	1.2399
	21.04	0.9599
	6.5205	0.24
	19.7195	0.44
	3.3995	0.7602
	5.4798	0.2399
	18.7595	0.6802
	26.1201	4.48
	31.5207	0.4
	4.159	0.1998
	3.1201	1.96
	6.8	0.52
	1.16	4.16
	21.6398	4.96
	5.08	1.04
	1.1203	0.8802
	14.721	0.56
	3.4805	7.56
	34.2003	1.3599
	0.2005	7.44
	5.239	2.6001
	8.801	1.3999
	3.4805	1.1201
	9.92	0.68
	8.7997	0.5598
	7.199	0.48
	5.0805	5.12
	3.2402	0.7601
	6.5607	0.12
	23.841	0.1599
	3.5998	0.1601
	6.359	0.2399
	0.08	0.2799
	10.5202	0.56
	26.2805	0.1601
	2	2.7601
	4.6396	0.1601
	0.6795	0.1998
	3	0.2402
	4.08	1.2801
	1.96	0.2
	22.5198	0.6398
	1.3204	0.7999
	12.9195	0.4
	6.5594	0.88
	8.2002	1.8801
	6.5595	0.5598
	4.92	0.5998
	5.92	1.08
	10	1.5201
	1.7198	1.04
	28.2003	0.2401
	10.2005	0.1598
	0.6795	0.1998
	4.7595	0.48
	2.7598	0.1999
	2.72	0.2801
	3.5205	0.0801
	7.7595	0.28
	3.6405	1.36
	2.681	0.0798
	1.3593	0.52
	6.2801	0.2399
	4.2401	0.8802
	5	3
	5.4395	0.4399
	11.5193	0.12
	19.16	1.7999
	0.239	0.1601
	15.1601	0.24
	22.4005	0.48
	1.96	0.1601
	15.079	0.12
	25.4002	1.2001
	9.04	0.2405
	9.96	0.08
	22.96	0.6405
	6.92	0.6797
	18.1602	0.279
	30.3993	0.2
	13.5605	0.08
	9.6407	0.2002
	1.721	0.3205
	5.0801	0.3595
	0.7196	0.1203
	3.6396	0.6805
	11.2405	0.2405
	9.4794	0.0801
	5.96	0.12
	0.96	0.7599
	27.4805	0.2802
	20.2793	0.1605
	14.5598	4.2401
	4.7998	0.4002
	5.5206	0.1201
	8.2003	0.1203
	5.2805	0.2802
	4.1603	0.6005
	10.08	0.3593
	16.7595	0.16
	7.4795	1.279
	45	0.08
	2.7598	0.2402
	6.4005	0.159
	42.4002	5.04
	4.6007	0.4002
	1.3202	0.3604
	17.04	1.3995
	1.319	0.2003
	6.3606	1.2005
	0.5595	0.239
	6.6795	0.4793
	12.7198	0.279
	1.0405	1.92
	7.0401	0.5205
	7.2793	1.5607
	2.6407	1.16
	4.5595	0.16
	5.7198	0.88
	7.4802	0.119
	11.3193	0.4395
	18.8397	0.12
	4.239	0.1603
	35.681	0.199
	1.76	0.2805
	4.3593	0.0801
	0.5195	0.0805
	17.041	0.4795
	7.76	0.199
	18.801	0.239
	24.0801	0.4005
	1.7189	0.6007
	17.5604	0.2
	4.6795	0.319
	24.84	0.5598
	8.1191	0.5598
	13.4785	1.12
	1.881	0.92
	18.4806	1.2
	14.08	0.6007
	8.08	0.16
	41.6819	1.7997
	2.5587	0.3606
	21.121	0.5595
	8.1602	0.0801
	11.959	2.881
	15.8787	1.1203
	10.2792	1.5206
	8.8397	1
	13.08	0.8799
	9.76	0.8399
	11.721	0.4793
	4.5195	3.3204
	8.16	0.079
	3.041	1.4806
	0.119	0.12
	10.8397	0.2401
	14.5604	0.92
	2.8395	0.6396
	14.6795	0.2
	12.4785	0.2805
	7.3982	0.3202
	13.281	0.2801
	32.5604	0.2405
	13.08	0.3193
	2.5218	0.2001
	43.7209	0.4395
	5.6818	0.079
	18.1601	0.5995
	8.1993	1.08
	4.3592	1.0405
	2.7206	0.2005
	7.121	0.279
	11.1195	0.2402
	4.3205	0.4002
	3.7205	2.88
	21.6385	1.12
	2.961	1.9599
	11.4398	0.5206
	4.879	0.6007
	16.6405	0.1205
	2.801	0.5994
	2.2405	0.16
	27.3595	0.2805
	16.16	0.961
	1.9195	2.4807
	4.4803	0.12
	9.6795	1.6395
	13.92	0.2795
	2.24	0.3593
	2.2793	0.239
	10.6795	0.119
	2.3202	0.2405
	3.16	0.1203
	2.9195	2.3604
	16.7597	1
	0.9195	0.3203
	23.76	0.3995
	6.3186	0.3204
	6.7598	0.5605
	28.8809	0.08
	6.4414	0.4002
	31.1215	0.2003
	7.92	1.3605
	2.3593	0.3593
	21.08	0.9195
	7.4806	0.6795
	22.24	0.681
	1.3595	0.08
	16.7208	1.0803
	7.3204	0.4406
	0.8005	1.5995
	0.0801	0.3595
	5.24	0.1601
	12.4804	0.3193
	15	0.24
	9.84	0.2805
	46.1605	0.12
	20.8789	2.04
	4.5214	1.319
	8.5585	0.3193
	15.5195	5
	4.041	1.5594
	25	0.3202
	4.8009	0.12
	4.4003	0.4807
	3.2381	1.119
	41	0.6405
	18.08	0.12
	6.5608	0.2405
	18.119	0.0803
	11.3203	1.3593
	14.76	0.2001
	5.7595	0.4394
	11.7597	0.2793
	2.24	3.5995
	0.4005	0.4395
	1.6018	0.2001
	21.959	0.2793
	0.5605	0.1201
	30.879	0.159
	30.799	0.5193
	6.2791	0.12
	16.121	0.4405
	3.3205	0.3195
	6.5607	0.08
	25.6797	0.2003
	29.199	1.6407
	31.1603	0.6797
	2.1993	0.2804
	1.6407	2.7595
	13.3592	0.3605
	18.16	0.6807
	0.5995	0.4795
	6.4395	1.2393
	10.3205	0.6797
	30.0801	1.5207
	3.3182	0.08
	1.5585	1.4393
	2.4786	0.2405
	22.5605	0.3994
	21.5197	0.2405
	17.16	1.5598
	7.6818	0.8399
	20	0.2003
	15.8008	0.2405
	4.1603	0.2003
	50.4787	0.5202
	5.6408	0.08
	5.6795	0.6795
	1.201	1.5607
	4.199	0.2003
	0.08	0.5195
	7.6795	0.2804
	47.4802	2.08
	1.84	0.2802
	13.041	0.7195
	2.3982	2.6795
	22.7595	0.3205
	11.16	1.9199
	1.8419	4.6798
	7.6409	3.4793
	10.6814	2.04
	1.5585	0.8399
	6.1195	1.4405
	29.5198	0.5994
	17.6409	0.3995
	6.2405	2.4005
	6	0.4794
	18.2401	0.2402
	6.4786	0.079
	6.4398	0.3993
	16.6405	0.3205
	25.4397	0.5995
	1.8805	0.2804
	20.4003	0.3605
	3.1602	0.5595
	20.4415	0.08
	8.1993	0.28
	3	0.6395
	1.92	0.3994
	5.3595	0.1601
	9.4392	0.7997
	23.5197	0.4795
	11.2795	0.3605
	0.6796	3.0803
	1.7189	1.1605
	8.4003	0.3995
	14.6385	0.2802
	18.8809	1.159
	4.92	0.08
	3.4397	0.4794
	14.1195	0.0801
	12.9219	0.159
	15.8009	0.08
	5.3592	0.4795
	16.1581	1.4005
	24.959	2.4006
	4.1602	0.2793
	1	0.4805
	11.1193	0.3201
	26.76	0.119
	20.8807	0.1203
	2.7205	0.2805
	23.6018	0.5195
	7.4005	0.5195
	10.16	0.6395
	4.4393	1.2803
	1.24	4.6405
	4.4785	0.3602
	0.5996	0.7998
	6.3204	0.5995
	1.3202	1.2403
	7.7595	0.88
	15.879	2.3605
	4.92	1.3993
	1.2811	0.16
	5.959	0.2805
	7.279	0.7597
	15.7209	0.12
	1.5586	1.4005
	4.961	2.96
	5.9589	0.4793
	8.6798	1.5593
	4.7208	1.1601
	0.6795	4.199
	15.7985	4.239
	0.92	0.6805
	3.2405	2.2002
	1	4.6807
	6.08	1.159
	25.1213	3.6007
	18.08	1.6396
	3.2791	3.4406
	11.7985	2.6407
	2.4803	0.88
	26.7595	4.5595
	19.6796	0.3993
	6.1193	2.6408
	21.5195	5.5606
	12.6795	1.5995
	0.1191	14.6387
	6.4005	0.6387
	9.0801	1.1995
	13.16	1.92
	3.3594	0.8397
	1.201	0.5605
	1.039	9.5997
	5.7595	4.3205
	15.4396	0.1581
	4.84	3
	5.4398	0.16
	0.961	0.8395
	5.8807	0.5214
	8.4803	2.7187
	35.039	0.4415
	7.7187	6.7187
	9.16	3.4005
	55.4805	0.5197
	6.7595	1.7209
	28.199	0.76
	10.3592	2
	6.0803	1.881
	10.5587	3.08
	3.2405	2
	25.3204	2.5605
	5.039	0.5194
	14.3205	2.1191
	1.9199	5.959
	22.7597	5.6795
	7.6797	13.7205
	39.3613	2
	10.16	6.92
	6.719	1
	5.8399	0.639
	5	3.2405
	24.5996	8.9609
	8.039	1.5604
	19.1213	4.959
	5.4005	0.7596
	1.8007	0.879
	8.08	2.121
	9.5995	5.6385
	12.16	2
	32.9197	0.4395
	20.4006	0.68
	5.1991	1.0801
	2.1992	11.961
	25.5605	5.92
	23.4005	6.2794
	8.4003	2.8805
	4.6407	0.16
	6.92	2.2381
	1.1583	3.2382
	24.719	1.3986
	19.879	6.6405
	15.5585	2.1605
	4.4788	0.5586
	4.5605	0.7187
	1.5195	3.879
	5.8809	3.879
	15.7985	1.7205
	41.5994	1.039
	3.5995	4.8807
	25.881	2.3593
	13.201	0.7597
	4.9589	1.4005
	16.5995	1.92
	0.6385	8.201
	0.3615	1.881
	21.16	3.8007
	2.4395	4.0805
	2.5195	2.041
	26.3205	2.5215
	1.9199	1.3982
	6.4395	0.5995
	21.2405	1.4805
	4.08	0.1602
	15.4784	0.8009
	12.5197	0.199
	8.4415	0.2814
	8.8825	1.4805
	4.6015	0.3986
	10.8007	1.2815
	6.6015	0.5995
	25.758	2.881
	7.5585	1.6408
	29.7189	0.1213
	18.3595	1.041
	55.6797	0.3595
	63.84	3
	16.082	0.4805
	10.199	0.3182
	3.039	3.92
	10.4022	2.1995
	9.1175	0.4804
	43.082	1.6404
	1.0823	0.16
	0.7189	0.5193
	54	5.92
	25.2385	3.961
	13.1602	3.5195
	42.5976	0.4005
	7.961	0.959
	8.0781	0.4395
	1.5975	0.119
	2.3982	1.4806
	27.4806	0.6407
	11.6407	0.2401
	4.7965	0.7595
	5.4372	0.1995
	0.9215	1
	2.961	0.7595
	23.3595	10.041
	11	0.08
	12.9219	1.2405
	6.5628	6.7189
	13.5585	0.3593
	13.7967	0.7205
	0.879	0.6014
	16.039	0.3182
	2.1992	0.4005
	2.3985	16.5996
	48.6404	0.201
	1.242	3.5587
	4.3985	2.7209
	5.84	1
	23.3594	0.2811
	9	1.68
	2.3595	0.8789
	1.6369	2.6405
	2.6405	0.3205
	0.7575	8.3203
	3.3631	4.4787
	2.3205	2.1991
	10.2773	1.4805
	4.2035	1.3205
	14.3205	1.8009
	17.5588	0.7619
	2.4414	1.4003
	7.922	0.4802
	1.16	2.1191
	16.5192	4.881
	6.121	2.9199
	7	0.6818
	5.918	1.6408
	4.6406	1.2401
	0.4412	1.4005
	2.801	0.201
	2.4021	5.6408
	3.2775	1.16
	20.2813	3.7987
	3.4802	1.1995
	28.4416	1.7599
	9.4023	2.039
	6.2381	1.8805
	2.2815	0.84
	28.3592	1.08
	4.1211	0.2791
	7.2813	5.3205
	37.3595	9.5998
	8.2813	1.2405
	11.7185	2
	2	2.881
	1.4803	0.4395
	5	0.3205
	0.8005	0.3203
	10.5195	0.879
	58.281	10.0395
	4.1213	0.5996
	13.5625	2.8805
	6.879	0.639
	2.2811	0.7208
	6.9215	7.8809
	16.6365	4.6795
	13.7185	0.8809
	9.8395	5.4395
	6.2385	3.7209
	6.039	1.041
	4.0821	1.799
	1.3985	1.2013
	28.961	0.3592
	23.84	0.6799
	4.1211	0.3204
	0.3205	0.5585
	10.6838	1.4805
	8.6405	0.7187
	23.1602	1
	12.5978	0.4396
	28.801	0.16
	11.6799	0.7595
	1.4372	2.4003
	13.2382	0.76
	1.039	0.5605
	15.6405	3
	0.4023	0.2405
	9.4025	0.1602
	0.3205	0.2794
	2.8397	2.0395
	17.082	0.7208
	0.6018	0.5587
	1.8395	0.1211
	13.961	2.08
	1.961	1.7599
	16.2381	0.5995
	4.1991	0.84
	10.9607	1
	3.4378	2.201
	5.7618	0.4002
	0.5979	0.5605
	1.6405	0.5997
	0.2811	5.4395
	1.5978	6
	19.3985	1.3592
	5.1992	1.6795
	9.4764	5.2405
	0.1601	4.5604
	12.3596	2.5197
	3.3985	0.7208
	2.6405	4.8809
	2.043	0.6385
	4.2813	12.9605
	6.801	1.6819
	4.2811	4.5195
	1.2381	1.1993
	0.5628	2.6387
	6.879	1.5195
	4.3205	1.3203
	1	2.961
	5.9605	1.801
	10.7965	0.7205
	19.3985	7.801
	2.918	2.6797
	5.7615	2.879
	4.039	0.3202
	22.8395	0.879
	7.7187	7.119
	22.4025	1.8399
	17.6406	3.7598
	6.4412	1.6798
	40.3633	1.16
	21.117	0.281
	6.4765	1
	0.2421	0.5603
	12.6797	1.039
	1.2382	3.3592
	6.922	4.281
	1.1171	3.8809
	4	1.4392
	6.1993	0.5605
	0.3592	4
	1.1605	5.4392
	0.1993	2.3615
	12.1995	4.4806
	5.879	6.5198
	9.16	5.1603
	2.16	1.6386
	3.7187	0.2381
	1.8395	4.801
	31.3593	4.801
	13.2383	3.2405
	2.2812	1.4393
	0.199	5.719
	20.3595	6.92
	59.5585	0.6407
	15.039	0.7987
	3.5585	0.4415
	87.1602	1
	12.6017	5.5214
	0.8785	2.5996
	10.281	0.4414
	4.6799	3.3203
	4.7226	1.2402
	26.039	0.6405
	1.121	0.5214
	6.3595	0.4392
	10.3202	0.08
	0.3162	0.6798
	1.082	0.16
	10.082	0.4393
	16.4376	1.119
	2.5628	1.4805
	10.6014	0.5196
	1.2421	1.7208
	7.4806	0.8785
	0.6365	0.121
	18.5195	1.5995
	6.6015	0.08
	27.1211	0.08
	2.121	0.199
	21.84	0.1601
	12.7618	1.92
	11.4022	0.2795
	0.5978	2.5607
	5.5194	0.879
	7.879	1.6795
	8.2811	0.4805
	70.1995	6.039
	1.2813	1.5198
	15.6795	0.16
	4.4025	0.2791
	2.5588	0.2015
	73.3205	1.4003
	18.2815	0.4002
	13.2383	1.7989
	1.9219	0.2011
	9.879	0.1581
	4.7185	0.4803
	3	0.84
	10.957	0.1605
	3.5627	0.6387
	2.5975	0.7599
	2.7575	0.4808
	29.281	0.16
	19.3205	0.7596
	2.082	0.2793
	30.8399	2.961
	3.7617	0.0805
	5.918	0.5605
	5.5979	0.2792
	4.8009	0.8395
	6.1993	0.5995
	1.6015	3.041
	1.3203	0.0805
	9.9607	0.2815
	26.3595	0.1601
	33.082	0.08
	28.9179	0.16
	6.68	2.5195
	1.961	0.4005
	36.4805	3.8009
	1.918	1.08
	6.922	0.881
	2.9609	1.92
	3.2815	0.8395
	20.7617	0.76
	7.879	1.2795
	17.4805	1.881
	3.6365	1.08
	2.961	0.4395
	33.0781	0.799
	10.8787	0.1993
	10.957	0.1605
	0.879	2.6797
	3.879	0.2792
	14.3202	0.2013
	6.4804	2
	11	0.5997
	1.043	0.24
	2.922	0.4392
	15.3203	0.119
	18.5198	0.0801
	5.8825	0.2795
	13.1171	0.1605
	24.117	2.6799
	29.8399	0.5585
	24.8009	1.5995
	58.5588	0.4395
	4.2812	0.3205
	6.8399	0.879
	3.2384	0.7185
	47	0.119
	43.3592	0.7595
	35.039	0.6405
	2.082	0.3595
	2.7227	0.201
	1.3202	0.5998
	23.5625	1.08
	14	0.08
	13.4765	0.3592
	26.4414	0.4005
	0.121	0.3182
	35.4025	0.1211
	24	0.3592
	1.6365	1.3205
	19.4805	0.5605
	11.4378	5.1605
	8.1171	3.6409
	0.4805	4.8809
	19.0783	0.2403
	4.8785	3.5195
	16.9607	2.2404
	3.5625	3.4804
	2.043	6.4395
	11.3594	3.3182
	5.2775	5.7207
	12.8787	3.5195
	9.5587	1.4802
	1.957	0.2381
	22.879	1
	2.3984	0.1995
	21.039	0.24
	3.6795	0.08
	15.4372	0.3614
	12.6797	0.1991
	1.2812	0.959
	10	2.1991
	4.5585	0.1603
	5.4376	1.6798
	5.7616	1.039
	8.5975	0.5998
	5.4764	0.1601
	3.7579	1.961
	40.7619	2
	11.8009	0.1603
	53	0.7187
	17.84	9.721
	17.2772	0.199
	5.4415	3.4804
	16.3203	1.8008
	24.5588	0.2403
	5.3594	2.6407
	4.8829	0.4415
	3.121	1.6018
	12.6405	5.2405
	4.3595	0.7185
	65.078	0.6405
	29	0.84
	17.9609	1
	42.8009	0.2405
	20.84	0.08
	3.5192	0.2011
	1.1215	1.3593
	3.1603	0.4785
	12.883	1.5995
	9.242	0.5607
	51.4375	2.3203
	1.2033	4.5194
	8.3595	2
	0.4805	6.7206
	10.3201	1.3203
	4.281	8.3594
	10.117	1.24
	5.281	1.4783
	34.84	0.5995
	5.16	2.5216
	5.922	2.4415
	19.078	9.8005
	33.121	0.4005
	17.082	0.4808
	109.16	0.799
	2.3163	0.879
	0.6016	3.2011
	10.039	0.799
	19.078	0.4001
	3.2813	1.6015
	8.121	0.5998
	11.7579	5.7205
	4.4803	13.9607
	46.5585	2.1583
	17.9215	1.76
	9.6407	1.4002
	9.7187	2.959
	23.3202	1.5195
	3.16	2.201
	13.6017	6.6405
	15.6799	0.1193
	19.039	0.2015
	3.961	1.1601
	5.922	3.041
	3.1605	0.84
	8.7185	3.4805
	20.1991	0.2793
	15.121	10.959
	4.2035	1.5996
	4.8009	5.959
	11.883	1.041
	29.117	0.2815
	20.6405	0.6389
	6.6407	1.961
	9.4767	2.1215
	10.2733	0.6404
	0.922	3.078
	1.1562	1.5624
	21	5.3982
	36.4765	3.961
	11.156	1.957
	15.5935	5.078
	7.0781	1.4022
	2.2421	0.7615
	11	6.2033
	1.3205	7.4806
	5.3672	4.8009
	30.6406	3.879
	5.3988	1.043
	7.4765	2.1171
	10.3593	2.4375
	23.078	5.4375
	1.0391	2.199
	13.1563	4.078
	3.4065	3.4415
	6.3201	1
	3.1565	0.9609
	5.7969	2.2815
	13.4846	0.4023
	5.9219	4.3202
	2.914	3.9179
	35.1561	1.2423
	24.1953	1.9215
	3.5626	0.1993
	0.3986	6.6018
	20.2421	0.4764
	11.0783	1.039
	0.883	1.1991
	0.961	2.7577
	3.6405	4.4413
	20.5158	0.1603
	21.4065	1.6797
	5.125	0.2382
	5.3985	0.078
	25.2425	2.5197
	14.117	0.4414
	4.078	5.918
	10.6015	2.3205
	16.125	0.7619
	27.883	3.879
	5.3672	0.762
	14.1641	0.8397
	1.8829	3.7185
	8.3985	2.6795
	1.5235	1.758
	11.4374	1.6405
	2.086	0.5978
	51.922	1.8789
	2.1562	1.6018
	1.6798	0.5195
	0.6797	10.3986
	7.3593	1.6408
	3.2342	0.9219
	1.7655	4.4023
	7.4375	2.3164
	18.4372	9.043
	8.4455	0.3635
	14.9217	1.1601
	11.961	1.5198
	2.086	6.6798
	0.6405	0.5235
	36.7187	0.3203
	5.4455	6.082
	18.6018	2.8397
	0.2031	1.8395
	0.8825	4.1602
	11.7188	1.8829
	7.883	1.4415
	0.281	2.3984
	21.1173	4.3205
	14.2425	0.6365
	5.3986	3.16
	0.4843	0.121
	25.3202	2.3205
	18.1645	5.4805
	2.8828	7.84
	7.883	2.8399
	7.4767	1.6015
	4.2425	0.4373
	28.4842	3.039
	13.164	4.2381
	11.875	0.1993
	26.3595	2.8785
	13.6017	1.16
	21.8357	0.4024
	3.242	1.3201
	10.9219	1.281
	3.2425	1.039
	10.7578	4.7578
	2.883	1.6365
	6.4842	2
	8.8825	0.082
	5.4375	2.5978
	2.797	3.3988
	1.6018	1.3595
	6	6.242
	1.961	1.7619
	20.4452	1.2382
	18.1565	1.082
	23.875	0.7615
	8.6015	1.3985
	0.078	1.5627
	16.1641	10.922
	43.1955	2.5585
	22.7578	4.8009
	6.883	3.8007
	9.6405	1.3592
	8.6796	2.6404
	1.2815	2
	20.3672	0.4021
	1.6015	3.1991
	5.6407	0.4412
	0.3205	1.4802
	2.8048	2.5977
	3.0391	0.2811
	5.4768	2.0391
	5	1.043
	4.3205	2.879
	11.086	4.16
	9.6795	1.8789
	3.7967	4.2425
	3.039	4.7579
	3.3593	8.043
	50	1.117
	12.047	1.16
	6.164	5.1991
	0.961	9.2035
	0.1175	7.5976
	19.2425	1.6408
	12.7575	2.2813
	7.961	1.3205
	29.3202	1.1211
	2.7185	1.84
	5.922	6.5195
	3.875	0.5192
	6.2815	0.3982
	0.0783	1.8827
	1.156	5.082
	3.6798	6.078
	5.4765	0.879
	13.2815	0.922
	1.8048	5.2421
	1.875	4.2813
	6.3595	0.7617
	6.8827	3.082
	9.8437	4.883
	12.4845	8.5588
	12.2421	0.4803
	18.3205	0.5235
	15.1562	5.3201
	6.1563	1.8397
	0.6796	1.1215
	3.8828	1.3203
	2.7577	3.8007
	3.3982	1.281
	12.8439	1.3983
	3.039	2.6409
	6.2813	0.84
	2	6.3592
	20.3202	4.8005
	2.961	2.3982
	1.2812	1.7188
	6.3988	0.3635
	18.2811	0.082
	3.1563	0.3203
	15.2733	3.2772
	23.039	8.8007
	4.8435	0.4413
	0.5235	1.7185
	0.1641	0.1561
	6.2425	1.5198
	5.3593	0.957
	2.242	0.0821
	2.4378	0.2815
	6.0781	0.242
	11.875	1.6369
	8.953	2.2772
	19.3983	7.039
	1.2732	0.078
	4.875	1.6405
	3	0.1991
	5.6015	4.6405
	11.2815	0.6408
	0.2421	2.6405
	13.6018	5.957
	3.3592	3.5585
	0.7578	1.3205
	12.5624	1.8008
	37.836	0.918
	7.922	1.0821
	15.4062	1.5582
	11.1952	0.3203
	11.4455	2.961
	7.0781	0.3205
	5.7969	3.3205
	38.3984	0.6796
	4.3205	2.719
	5.2425	2.7188
	0.8829	1
	0.1171	1.5978
	1.1563	1.1993
	0.7657	1.6797
	11.2812	3.5196
	2.875	4.84
	1.7579	0.4415
	9.2815	5.2383
	2.0781	2.6795
	5.3203	4
	32.914	1.039
	2.5233	0.8399
	5.7187	0.3593
	3.4845	0.3591
	1.3986	0.5196
	1.2814	5.8789
	7.0783	5.8829
	0.7187	5.4803
	0.078	9.758
	0.2423	2.6015
	8.4373	11.84
	22.5235	6.4375
	6.6797	3.8008
	0.3595	0.32
	13.0781	2.3635
	0.9219	3.3205
	0.4453	5.8009
	6.0395	2.3985
	3.6328	3.16
	6.7657	4.922
	9.961	1.9609
	9.6795	4.7185
	12.922	4.9177
	4	2.8829
	1.4765	4.4414
	11.922	1.7186
	7.4845	0.7969
	0.117	0.6797
	2.4377	0.922
	1.6405	2.7615
	3.961	1.5975
	1.8829	2.8439
	0.6409	10.039
	13.961	0.5979
	0.3593	3
	10.6015	5.918
	4.3202	9.5198
	7.5627	0.3205
	0.32	10.3204
	19.5235	0.5979
	18.6018	0.9219
	49	3.3592
	5.4378	15.4807
	2.5235	2.8397
	3.2423	2.16
	24.125	4.6798
	10.3985	0.6796
	18.078	2.4418
	11.836	4.8398
	18.914	2.8399
	9.6406	7.961
	9.4376	21.3595
	2.961	3.5625
	8.7187	2.879
	4.047	1.1173
	0.078	4.4806
	9.5157	4.6015
	0.4375	4.8395
	7.3675	6.6365
	8.797	1.8785
	4.039	1.6799
	23.6408	3.918
	1.1953	2.5975
	6.164	0.918
	2.5155	3.5588
	5.117	0.6018
	6	0.4804
	6.3592	3.3591
	22.5548	1.1995
	0.6409	0.5194
	2.4065	2.2382
	25.6795	4.7227
	0.875	3.7227
	7.6799	9.2811
	9.242	1.879
	0.4845	4.9179
	10.7579	2.5588
	6.9609	1.117
	20.086	1.1601
	11.039	4.2385
	19.719	1.719
	4.125	1.5236
	4.8045	0.5978
	3	1.5584
	1.2421	2.1991
	14.039	0.758
	0.5545	3.3985
	12.5627	2.3986
	22.922	4.6015
	6.4768	2.5238
	5.078	2
	7.953	1.4805
	6.5158	4.7965
	14.6405	1
	0.3592	0.4418
	7.836	2.1601
	1.8825	3.082
	10.164	2.7225
	22.281	3.719
	33	2.918
	6.164	0.2772
	1.7578	4.961
	11.6405	3.2811
	8.047	0.4807
	2.3595	3.2425
	0.086	3.797
	0.6406	5.758
	14.6018	4.3983
	1.125	1.3203
	2.6405	2.957
	3.3983	6.16
	5.5625	7.4805
	8.242	2.7575
	11.805	3.5192
	11.6014	0.7577
	23.117	0.16
	4.7579	0.4803
	3.6797	0.7575
	1.7187	0.121
	31	2.1213
	1.4762	0.758
	17.836	3.6365
	0.078	4.7579
	4.078	4.5198
	4.9217	1.5978
	3.836	4.1561
	12.2425	0.3988
	5.2033	0.1992
	3.2813	2.3204
	10.914	1.16
	5.7577	0.7967
	12.5627	0.5585
	8.961	2.2383
	3	0.4025
	2.8828	1.8397
	14.5158	3.3593
	10.5235	8.6795
	4.242	0.4802
	18.836	9.043
	2.6405	2.3202
	0.3984	2.7577
	1.4376	1.4802
	4.961	2.3202
	5.922	4.4415
	6.4375	2.5627
	13.125	4.2812
	6.922	2.7618
	4.5232	1.3595
	0.961	7.0821
	5.3984	0.6408
	1.2031	0.6797
	0.8048	2.7187
	7.2422	1.7227
	11.7579	0.8009
	0.281	0.6795
	1.1171	2.2381
	23.0783	0.2421
	0.8437	2.3592
	0.5622	2.281
	7.7575	10.2423
	5.5547	11.6406
	2.4765	1.84
	3.6797	2.3635
	2.039	0.16
	11.4764	0.7575
	27.8438	0.6799
	4.5622	5.3986
	8.8047	3
	28.1173	3.5235
	10.953	2.8825
	6	1.6015
	21	7.6015
	14.1643	1.0785
	19.0391	0.3202
	6.7967	2.1991
	24.3203	3.918
	2.3205	3.4414
	17.086	5
	17.2423	2.5193
	23.6407	2.2425
	3.039	8.2421
	1.1562	6.4805
	2.719	11.3595
	5.883	2.5198
	3.3592	0.3595
	10.4375	0.6838
	5.875	0.7188
	0.3204	1.6407
	7.3205	1.082
	26.8437	0.922
	14.797	2.5587
	28.078	26.7226
	5.5238	1.121
	11.7578	3.039
	0.164	10.121
	0.7267	7.5195
	9.9215	3.957
	5.6795	5.6406
	5.922	2
	36.7188	16.039
	7.203	6.4378
	27.7579	1.7619
	23.5937	3
	0.4062	3.0781
	13.117	0.3633
	21.6408	4.3985
	3.242	0.4374
	1.8049	2.5585
	3.164	0.5584
	2.6795	1.2423
	14.4454	1.1601
	10.039	2.3205
	51.9219	7.6407
	0.7265	9.0785
	5.5236	4.1995
	2.2735	0.3596
	2.4768	3.5195
	11.3202	3.5587
	6.6797	0.4415
	31.2421	3.6796
	16.9609	4
	26.086	2.918
	2.8825	2.6018
	24.8435	3.6795
	3.3205	3.5194
	1.7579	3
	3.914	5.2384
	1.3205	7.0395
	30.2035	0.7228
	10.9217	0.4805
	1.961	1.1605
	1.203	2.3595
	9.2735	2.8398
	8.2035	6.2811
	10	0.8399
	8.5236	3.117
	2.4453	5.3205
	6.4766	0.5628
	16.3201	0.5624
	1.086	1.4372
	14.9607	2.961
	26.242	3.4372
	7.3202	1.16
	9.961	2.5195
	14.2035	16.2382
	3.0781	5.1175
	10.3982	1.6409
	14.1951	3.1992
	8.4845	0.4805
	1.5158	15.4412
	6.4765	4.5236
	27.242	2.922
	23	1.1991
	0.6795	5.203
	0.4373	0.4415
	9.7185	4.922
	4.32	0.8399
	17.6795	2.4808
	2.2735	4.4023
	24.1172	1.9605
	18.4455	0.5192
	38.7267	5.2814
	15.3982	0.6405
	29.281	3.16
	0.6014	1.758
	41.6874	1.4802
	25.125	8.9219
	8.078	1.918
	24.4373	3.7185
	15.5625	1.121
	0.758	2.5585
	8.3593	1.879
	32.7577	4
	51.922	5.8395
	6.875	1.7615
	30	0.5194
	39.2815	0.6795
	2.039	4
	6.047	3.5192
	17.7579	2.5622
	2.5157	2.8789
	0.836	1.039
	5	1.4412
	21.875	1.2422
	42.0393	6.4415
	7.2815	0.5197
	14.078	2.8007
	2.922	7.7619
	3.3985	1.5237
	7.4768	0.961
	23.7655	6.7618
	2.7186	8.16
	31.844	0.4412
	12	1.1601
	34.4843	1.6835
	33.4842	0.918
	10.555	2.4418
	6	1.6405
	2.8437	0.199
	14.875	0.6015
	1.3593	6.3985
	4.6018	4.039
	1.8439	2.2421
	37.281	1.4375
	0.5622	0.3593
	42.3202	3.8005
	23.117	2.9217
	19.844	1.5196
	14.875	0.7615
	10.039	0.4808
	1.883	2.9219
	13.5625	0.156
	48.6796	3.4415
	16	2
	16.836	1.082
	7.3596	2.5198
	2.5235	0.1991
	29.1954	2.4373
	6.078	0.6795
	4.4375	0.4375
	37.797	1.4375
	3.922	3.0781
	49.203	2.039
	21	0.2813
	20.922	2.3204
	14.4374	5.3203
	12.3592	2.5237
	33.961	1.4375
	0.2422	3.16
	7.8357	4.6798
	3.2811	4.762
	3.9219	7.7619
	8.164	0.2423
	13.203	0.3983
	2.242	1.3988
	4.0783	2.3592
	10	1.16
	4.1955	1.3202
	2.242	1.0783
	13.7579	0.84
	13.3595	2.039
	2.9607	8.1561
	24.922	0.125
	7.4375	4.8827
	0.961	2.6407
	33.7579	1.086
	68.8828	3.2031
	17.1643	1.8827
	2.6017	0.3988
	3.3201	2.3983
	22.1953	1.758
	2.281	3.961
	17.3202	0.3205
	9.8437	0.4376
	0.4765	4.3595
	24.844	0.7575
	12.844	0.3983
	7.2035	2.1171
	7.9609	1.3592
	3.6015	2.4845
	2.2423	0.9219
	13.3204	1.7188
	11.914	0.7575
	2.7575	0.5938
	56.7575	1.6404
	3.3203	1.6017
	22.1561	4.5937
	12.8048	1.2815
	15.0391	2.836
	13.6015	1.4842
	2.7657	0.875
	22.6405	1.797
	0.3595	3.875
	4.3671	5.6795
	1.039	0.7189
	6.3592	3.125
	3.922	3.883
	36.2035	0.5628
	6.2343	8.7657
	5.8045	2.797
	11.6795	2.039
	25.6797	2.4452
	29.5155	0.3672
	3.2812	0.6014
	16.203	2.1645
	2.3591	0.4376
	35.5157	1.7579
	10.7187	7.203
	6.844	6.281
	6.3986	5
	16.1953	0.5157
	54.961	0.4065
	12.68	1.7187
	19.117	2.4452
	7.367	1.5625
	15.6874	3.195
	4.5157	2.6408
	5.6016	1.3203
	6.9143	0.5938
	6.8046	0.3985
	10.2815	0.281
	2.4765	1.5232
	9.914	1.242
	0.2031	1.3593
	6.633	2.2422
	2.3982	1.875
	21.836	0.7267
	1.8437	0.922
	12.961	1.2423
	22.4061	1.0783
	3.4372	2.086
	12.6405	0.961
	16.32	3.5235
	6.078	1.4453
	3.9609	3.2815
	24.4843	1.4764
	26.3592	0.7577
	7.8827	3.4378
	2.922	0.7657
	11.164	3.7188
	0.5548	1.2033
	19.594	0.875
	13.5625	2.2421
	12.1561	1.4375
	23.6407	8
	20.4375	7.5622
	7.8048	2.719
	2.039	3.039
	7.836	8.1561
	25.1951	2.281
	0.4765	4.6015
	1.7185	0.1562
	4.4062	1.4455
	6.117	4
	0.6015	0.4765
	7.2033	1.7577
	3.4376	1.7579
	21.6799	1.836
	11.4375	3.8828
	9.3203	2.6015
	26.6017	1.8825
	15.078	3.6795
	40.7655	2.086
	17.406	0.1561
	18.7969	2.039
	16.9607	1.6405
	9.3986	0.2733
	1.4453	3.7188
	2	1.1563
	0.9219	0.961
	1.281	1.3204
	4.4375	0.4452
	1.6797	1.7965
	4.7188	2.281
	4.3985	0.3593
	7.117	1.961
	0.836	0.9609
	17.836	1.6795
	9	5.3595
	8.4378	1.3984
	44	0.6408
	4.0393	1.039
	5.3985	0.164
	15.1955	1.6798
	6.5155	1.3593
	4.9219	7.6797
	34.8047	0.4374
	56.8438	0.7578
	2.961	4.242
	1.4453	3
	23.281	0.4767
	7.8048	1.961
	17.3205	1.047
	0.4452	0.8045
	51.758	1.2425
	27.117	1.0781
	4.7185	1.039
	7.5548	1.5938
	5.875	2.6408
	7.2811	2.4845
	1.2812	1.5628
	11.6797	1.7189
	0.7188	2.4373
	5.8438	2.1171
	8.4845	3.047
	5.7185	1.922
	18.9141	0.4842
	4.3205	3.961
	10.1565	1.086
	0.4765	1.1173
	9	1.4764
	10.4063	2
	15.5624	4.4062
	5.2735	4.078
	14.7188	0.6797
	1.039	1.836
	1.7658	1.32
	14.4063	3.6405
	23.078	1
	4.5938	0.2813
	1.875	9.2732
	6.195	1.2815
	11.758	3.9219
	1.7188	0.797
	3.6406	0.3201
	4.4375	0.6796
	7.8439	0.4765
	15.8827	0.2425
	29.1952	0.719
	2.3595	0.758
	17.836	2.3985
	0.5625	5.6018
	27.883	2.3982
	5.203	2.2813
	11.4374	0.2812
	1.6016	1.6016
	8.7187	1.2033
	12.5235	3.039
	9.164	1.7579
	19.3201	2.4764
	9.2346	3.3202
	13.039	2.039
	5.8048	1.5545
	0.8829	1.125
	5.5156	0.242
	6.4374	1.6877
	23.2031	1.4768
	13.6408	3.6798
	1.078	4.875
	24.6407	2.6325
	17.164	2.961
	1.8045	0.5155
	7.5624	3.4452
	16.2815	1.8439
	15.4375	2.7965
	9.2815	2.242
	0.8047	3.961
	26.078	1.4762
	3.0393	3.4376
	10.3204	5
	1.8046	1.039
	8.961	0.1562
	8.3595	1.281
	8.758	0.2342
	5.8829	2.4768
	21	2.0781
	36.242	0.5625
	31.078	1.2815
	22.6015	3.5235
	1.125	0.6015
	4.4452	2.078
	8.875	1.5626
	4.6795	0.3595
	0.5622	1.6798
	17.6797	0.281
	13.6795	1.5625
	27.8048	0.7967
	25.6017	0.0785
	26.4765	1
	0.5625	2.164
	7.5622	1
	8.6015	0.1952
	3.922	0.4373
	5.086	4.4843
	8	1
	0.2346	0.3595
	0.9219	1.2811
	7.7578	0.4373
	4.8439	3.125
	33.203	6.2422
	31.5627	5.5235
	6.32	1.6405
	20.4765	1.953
	7.8355	0.7185
	1.758	0.914
	1.5236	4.4377
	11.7578	4.8825
	25.4375	1.6018
	5.242	0.4062
	25.3205	3.6795
	5.039	0.4765
	6.7579	2.961
	0.719	0.4376
	14.922	3.6018
	0.4375	5.5628
	30.445	4.3985
	10.7265	3.6325
	7.4455	1.164
	14.4455	0.5548
	14.9219	1.4373
	1.8829	5.3982
	3.039	1.164
	11.164	0.4062
	15.961	3
	11.594	1.3205
	2.6017	1.4455
	17.0783	3.8829
	0.9605	3.4376
	4.5545	5.3672
	9.6015	1.6407
	17.4767	0.7658
	5.2422	0.7189
	4.3593	9.1563
	25.039	2.203
	8.6014	1.1563
	2.914	1.6795
	16.7579	2.875
	13	2.6795
	0.7264	1.8437
	5.5233	0.3205
	6.2031	2.039
	9.9219	3.3986
	23.2345	6.4843
	4.3205	0.3592
	9.8439	0.8827
	19.039	0.875
	26.4455	1.5232
	19.4373	1.836
	21	2.5622
	2.3985	8.4455
	25.7969	0.5628
	33.3594	1.0391
	6.875	0.2815
	7.6798	1.3592
	5.961	0.4375
	7.9531	7.039
	14.3984	1.4845
	21.922	1.719
	2.2815	0.875
	25.1955	0.2733
	21.8359	0.3203
	9.4764	4.164
	30.2423	0.7189
	1.203	6.3203
	9.2812	1.1953
		1.8438
		1.7188
		6.4375
		0.5625
		0.3983
		5.9607
		1.3595
		0.3203
		3.8045
		1.844
		1.3203
		0.7577
		1
		1.7575
		3.961
		7.2811
		5.039
		1.281
		2.5158
		4.7579
		3.5548
		2.5545
		0.5628
		0.2811
		0.4375
		3.4843
		4.8435
		5.1562
		3.914
		7.7969
		1.2421
		0.875
		6.4455
		0.2733
		0.6797
		2.6408
		0.4378
		1.7965
		0.3982
		16.9219
		0.5547
		0.8439
		4
		1.961
		4.1641
		5.1173
		1
		5.8827
		1.8435
		1.8047
		3.125
		3.1173
		0.4765
		0.8438
		0.203
		0.7969
		2.1171
		0.4452
		1.3205
		2.1562
		1.4374
		1.3596
		4.961
		3.203
		4.8047
		5.5625
		2.4376
		2.5545
		2.4453
		1.3595
		3
		1.4846
		1.078
		0.281
		2.6015
		3.2421
		2.5158
		3.961
		2.078
		1.2345
		0.961
		0.2345
		1.2814
		1.836
		0.1171
		0.5625
		1.8828
		2.4375
		2.5624
		0.3202
		2.242
		0.3988
		1.4764
		0.922
		2.1952
		1.6017
		1.3204
		4.7189
		1.242
		1.0395
		0.1175
		0.5236
		0.7969
		0.6795
		5
		1.078
		1.8435
		8.922
		1.3595
		1.2815
		0.3596
		2.6407
		4.078
		2.875
		0.6799
		2.039
		0.922
		4
		0.3594
		2.7965
		1.3982
		0.4845
		2.3205
		0.4375
		7.4842
		1.2813
		0.8828
		2.1561
		3.3594
		0.5155
		1
		2.3595
		0.3983
		1.6015
		0.125
		6.5625
		0.1175
		9.5624
		5.203
		0.9219
		2.3592
		5.5547
		1.3985
		1.117
		0.4455
		0.8827
		4.961
		2.5624
		1.5238
		1.883
		5.164
		0.5158
		5.9219
		4.6796
		0.5625
		5.7655
		1.875
		2.3983
		1.6797
		2.2425
		0.4453
		0.5155
		1.961
		2.6798
		1.883
		2.3595
		0.5626
		2.7188
		2.3202
		4.1172
		0.6406
		2.1171
		5.3985
		1.6407
		0.32
		1.3982
		6.6796
		2
		0.3203
		0.4766
		0.922
		6.0391
		5.039
		1.6017
		0.4845
		2.203
		8.7577
		5.5233
[truncated: 857 more rows]

## Sheet: Figure 3-figure supplement 1
MthK IR		MthK Pore
Volume (ml)	Normalized UV	Volume (ml)	Normalized UV
8.99526	19.9749	9.00456	0.51245
9.01925	19.9712	9.03051	0.51686
9.04324	19.9988	9.05646	0.52756
9.06723	20.0476	9.08241	0.54078
9.09121	20.1196	9.10836	0.56093
9.1152	20.2194	9.13431	0.58485
9.13919	20.3359	9.16026	0.61255
9.16318	20.475	9.18621	0.6541
9.18716	20.6329	9.21216	0.69502
9.21115	20.8043	9.23811	0.73846
9.23514	20.9901	9.26406	0.79701
9.25912	21.1918	9.29	0.85052
9.28311	21.399	9.31595	0.91977
9.3071	21.6111	9.3419	0.98902
9.33109	21.8259	9.36785	1.0696
9.35507	22.045	9.3938	1.15774
9.37906	22.2561	9.41975	1.2421
9.40305	22.4672	9.4457	1.33653
9.42704	22.6778	9.47165	1.44544
9.45102	22.8779	9.4976	1.56758
9.47501	23.0751	9.52355	1.69789
9.499	23.27	9.5495	1.84772
9.52299	23.4651	9.57545	2.01833
9.54697	23.6668	9.6014	2.21097
9.57096	23.8748	9.62735	2.4332
9.59495	24.0969	9.6533	2.69699
9.61894	24.3414	9.67925	3.00609
9.64292	24.6134	9.7052	3.38193
9.66691	24.9139	9.73115	3.82765
9.6909	25.251	9.7571	4.36781
9.71488	25.6353	9.78305	5.02254
9.73887	26.0679	9.809	5.79562
9.76286	26.5446	9.83495	6.70217
9.78685	27.0758	9.8609	7.75478
9.81083	27.6683	9.88685	8.96918
9.83482	28.3057	9.9128	10.3454
9.85881	29.0054	9.93875	11.8796
9.8828	29.769	9.9647	13.5592
9.90678	30.5946	9.99065	15.3616
9.93077	31.4883	10.0166	17.2887
9.95476	32.4647	10.0426	19.3152
9.97875	33.5216	10.0685	21.3889
10.0027	34.7428	10.0945	23.4903
10.0267	36.0607	10.1204	25.5691
10.0507	37.5157	10.1463	27.5648
10.0747	39.1724	10.1723	29.5246
10.0987	41.0232	10.1982	31.3301
10.1227	43.0671	10.2242	32.9417
10.1467	45.3416	10.2501	34.3652
10.1706	47.8605	10.2761	35.5456
10.1946	50.6262	10.302	36.5163
10.2186	53.5916	10.328	37.2088
10.2426	56.7307	10.3539	37.6161
10.2666	60.0395	10.3799	37.7717
10.2906	63.5317	10.4058	37.6678
10.3146	67.1039	10.4318	37.3303
10.3386	70.731	10.4577	36.7568
10.3625	74.4911	10.4837	36.0014
10.3865	78.1806	10.5096	35.0772
10.4105	81.7898	10.5356	34.0063
10.4345	85.267	10.5615	32.814
10.4585	88.6303	10.5875	31.5492
10.4825	91.6119	10.6134	30.1938
10.5065	94.266	10.6394	28.8201
10.5305	96.5063	10.6653	27.4294
10.5544	98.2528	10.6913	26.0318
10.5784	99.4492	10.7172	24.6443
10.6024	100	10.7432	23.2725
10.6264	99.9107	10.7691	21.9668
10.6504	99.1326	10.7951	20.704
10.6744	97.6924	10.821	19.4952
10.6984	95.6352	10.847	18.3658
10.7224	92.9453	10.8729	17.2924
10.7463	89.7563	10.8989	16.2921
10.7703	86.1067	10.9248	15.3723
10.7943	82.2209	10.9508	14.535
10.8183	78.1665	10.9767	13.7506
10.8423	73.9822	11.0027	13.0298
10.8663	69.9024	11.0286	12.3851
10.8903	66.0286	11.0546	11.8021
10.9142	62.3203	11.0805	11.2645
10.9382	58.9525	11.1065	10.7697
10.9622	56.0329	11.1324	10.3309
10.9862	53.4494	11.1584	9.9412
11.0102	51.2728	11.1843	9.5918
11.0342	49.3972	11.2103	9.28584
11.0582	47.8323	11.2362	9.01325
11.0822	46.5443	11.2622	8.78346
11.1061	45.459	11.2881	8.59019
11.1301	44.4849	11.3141	8.41832
11.1541	43.6394	11.34	8.27856
11.1781	42.8538	11.366	8.16965
11.2021	42.0723	11.3919	8.08277
11.2261	41.2632	11.4179	8.01478
11.2501	40.4505	11.4438	7.96127
11.2741	39.5832	11.4698	7.92539
11.298	38.6613	11.4957	7.89013
11.322	37.6915	11.5217	7.85802
11.346	36.6612	11.5476	7.83347
11.37	35.5938	11.5736	7.80892
11.394	34.4903	11.5995	7.78563
11.418	33.3545	11.6255	7.7573
11.442	32.2059	11.6514	7.72456
11.466	31.0539	11.6774	7.68993
11.49	29.8794	11.7033	7.65783
11.5139	28.7437	11.7293	7.62887
11.5379	27.6254	11.7552	7.60306
11.5619	26.5496	11.7812	7.58102
11.5859	25.4968	11.8071	7.56465
11.6099	24.4742	11.8331	7.56403
11.6339	23.5121	11.859	7.57284
11.6579	22.5978	11.885	7.59361
11.6819	21.7134	11.9109	7.62698
11.7058	20.8913	11.9369	7.6742
11.7298	20.1216	11.9628	7.72834
11.7538	19.3878	11.9888	7.79381
11.7778	18.7209	12.0147	7.87313
11.8018	18.0774	12.0407	7.95497
11.8258	17.4831	12.0666	8.03808
11.8498	16.9349	12.0926	8.13062
11.8737	16.4239	12.1185	8.22883
11.8977	15.9422	12.1445	8.31948
11.9217	15.5085	12.1704	8.40007
11.9457	15.1023	12.1964	8.47561
11.9697	14.7181	12.2223	8.55116
11.9937	14.3716	12.2483	8.61222
		12.2742	8.66007
		12.3002	8.69595
		12.3261	8.71862
		12.3521	8.72932
		12.378	8.72869
		12.404	8.71358
		12.4299	8.68777
		12.4559	8.65063
		12.4818	8.6053
		12.5078	8.55556
		12.5337	8.50331
		12.5597	8.4498
		12.5856	8.4051
		12.6116	8.37048
		12.6375	8.36229
		12.6635	8.39125
		12.6894	8.48317
		12.7154	8.66825
		12.7413	8.98366
		12.7673	9.4873
		12.7932	10.2352
		12.8192	11.3186
		12.8451	12.8428
		12.8711	14.8737
		12.897	17.5178
		12.923	20.8255
		12.9489	24.8332
		12.9749	29.5944
		13.0008	35.0589
		13.0268	41.1265
		13.0527	47.682
		13.0787	54.6127
		13.1046	61.692
		13.1306	68.8909
		13.1565	75.7171
		13.1825	82.0654
		13.2084	87.7169
		13.2344	92.5071
		13.2603	96.2668
		13.2863	98.7522
		13.3122	100
		13.3382	99.9137
		13.3641	98.5457
		13.3901	95.947
		13.416	92.2792
		13.442	87.7805
		13.4679	82.6031
		13.4939	76.9585
		13.5198	70.9803
		13.5458	65.1394
		13.5717	59.5012
		13.5977	54.1626
		13.6236	49.2439
		13.6496	44.8314
		13.6755	41.0314
		13.7015	37.664
		13.7274	34.9248
		13.7534	32.6534
		13.7793	30.7478
		13.8053	29.2715
		13.8312	28.1295
		13.8572	27.3016
		13.8831	26.7187
		13.9091	26.3699
		13.935	26.2509
		13.961	26.3132
		13.9869	26.5493
		14.0129	26.939
		14.0388	27.4622
		14.0648	28.11
		14.0907	28.8484
		14.1167	29.6706
		14.1426	30.569
		14.1685	31.5202
		14.1945	32.5055
		14.2204	33.5127
		14.2464	34.5131
		14.2723	35.4902
		14.2983	36.4376
		14.3242	37.3429
		14.3502	38.1865
		14.3762	38.9413
		14.4021	39.6125
		14.4281	40.1822
		14.454	40.6443
		14.48	40.9981
		14.5059	41.2348
		14.5319	41.3475
		14.5578	41.3513
		14.5838	41.2461
		14.6097	41.0314
		14.6357	40.7343
		14.6616	40.3559
		14.6875	39.9001
		14.7135	39.394
		14.7394	38.8444
		14.7654	38.2633
		14.7913	37.6514
		14.8173	37.0363
		14.8432	36.4206
		14.8692	35.8037
		14.8951	35.1842
		14.9211	34.5805
		14.9471	33.9692
		14.973	33.3409
		14.999	32.7013

## Sheet: Figure 4
Ca	21C			n	37C			n
0.1	-4.717	0.256	0.343	10	-2.1	0.271	0.344	4
0.2	-3.321	0.4	0.646	3	-1.504	0.094	0.1	3
0.5	-2.277	0.264	0.337	5	-0.986	0.147	0.158	4
1	-0.422	0.355	0.384	6	-0.223	0.068	0.068	3
2	-0.267	0.406	0.43	4	-0.057	0.318	0.321	4
5	-0.28	0.062	0.062	4	0.102	0.265	0.261	3
10	-0.1	0.088	0.089	5	0.214	0.135	0.133	3
	ln (Po/Pc)	Error +	Error -		ln (Po/Pc)	Error +	Error -
	Hill fitting
start	0.00922	0.11682
end	0.44526	0.55583
K	0.70251	0.58232
n	4.02361	1.82046
	21C	37C
X-	-4.67712	-2.02289
X+	-0.219841	0.224255
delta x	4.45728	2.24715
R
1.9872*10e-3
delta G	2.6041	1.38432

[truncated: 4 more sheets: Figure 4-figure supplement 1, Figure 5, Figure 5-figure supplement 1, Figure 5-figure supplement 3]
