# Supplementary material for: Activation of the archaeal ion channel MthK is exquisitely regulated by temperature
Source: eLife. 2020 Dec 4;9:e59055. doi: 10.7554/eLife.59055 (PMC7717905; doi:10.7554/eLife.59055)
Supplement: Figure 5—source data 1. [file elife-59055-fig5-data1.xlsx]

## Sheet: Sheet1
L0	0.1		thetaUO	8		thetaBO	150		netatheta	42.1875
Kb	20		thetaUC	18		thetaBC	8
Hill Plot = ln(po/1-po)													Po
Instance 4	thetaBC is T sensitive												Instance 4	thetaBC is T senstive
dH	-71000												dH	-71000
dS	-220												dS	-220
	T(K)													T(K)
	293	295	297	299	301	303	305	307	309	311	313			293	295	297	299	301	303	305	307	309	311	313
Value of parameter	14.6542	12.0267	9.89655	8.16499	6.75362	5.60024	4.65524	3.87904	3.2399	2.71234	2.27585		Value of parameter	14.6542	12.0267	9.89655	8.16499	6.75362	5.60024	4.65524	3.87904	3.2399	2.71234	2.27585
Ca conc													Ca conc
1e-05	-3.10994	-3.10991	-3.10988	-3.10986	-3.10985	-3.10983	-3.10982	-3.10982	-3.10981	-3.1098	-3.1098		1e-05	0.0426993	0.0427005	0.0427015	0.0427022	0.0427029	0.0427034	0.0427038	0.0427042	0.0427045	0.0427047	0.0427049
3e-05	-3.10282	-3.10273	-3.10266	-3.1026	-3.10255	-3.10251	-3.10248	-3.10246	-3.10244	-3.10242	-3.1024		3e-05	0.0429912	0.0429948	0.0429978	0.0430001	0.0430021	0.0430036	0.0430049	0.043006	0.0430069	0.0430076	0.0430082
9e-05	-3.08179	-3.08152	-3.08131	-3.08114	-3.081	-3.08088	-3.08079	-3.08071	-3.08065	-3.08059	-3.08055		9e-05	0.0438648	0.0438758	0.0438848	0.043892	0.0438979	0.0439028	0.0439067	0.04391	0.0439127	0.0439149	0.0439167
0.00027	-3.02146	-3.02067	-3.02003	-3.01952	-3.01909	-3.01875	-3.01847	-3.01823	-3.01804	-3.01788	-3.01775		0.00027	0.0464659	0.0465007	0.046529	0.046552	0.0465707	0.046586	0.0465986	0.046609	0.0466175	0.0466245	0.0466303
0.00081	-2.86137	-2.85904	-2.85714	-2.85559	-2.85433	-2.8533	-2.85245	-2.85176	-2.85118	-2.85071	-2.85032		0.00081	0.0540964	0.0542161	0.0543135	0.054393	0.0544579	0.0545111	0.0545547	0.0545906	0.0546202	0.0546447	0.0546649
0.00243	-2.50456	-2.49771	-2.49213	-2.48756	-2.48383	-2.48077	-2.47825	-2.47618	-2.47447	-2.47305	-2.47188		0.00243	0.075539	0.0760186	0.0764119	0.0767346	0.0769997	0.0772177	0.0773972	0.0775452	0.0776676	0.0777689	0.0778529
0.00729	-1.90827	-1.88906	-1.87321	-1.86014	-1.84936	-1.84047	-1.83312	-1.82704	-1.82201	-1.81783	-1.81437		0.00729	0.129175	0.131352	0.13317	0.134686	0.135948	0.136996	0.137867	0.138591	0.139193	0.139694	0.140111
0.02187	-1.19879	-1.15056	-1.10968	-1.07517	-1.04614	-1.02176	-1.00135	-0.984255	-0.96996	-0.958005	-0.948004		0.02187	0.231691	0.240387	0.247931	0.254421	0.259968	0.264684	0.268677	0.272048	0.274888	0.277278	0.279286
0.06561	-0.597499	-0.500315	-0.413949	-0.337793	-0.271121	-0.213129	-0.162974	-0.119808	-0.0828096	-0.0512045	-0.0242781		0.06561	0.354916	0.377467	0.397966	0.416346	0.432632	0.446918	0.459346	0.470084	0.479309	0.487202	0.493931
0.19683	-0.234791	-0.0878433	0.049497	0.17696	0.294398	0.401799	0.499296	0.587162	0.665798	0.735715	0.797503		0.19683	0.44157	0.478053	0.512372	0.544125	0.573072	0.59912	0.622294	0.642714	0.660562	0.676058	0.68944
0.59049	-0.0711182	0.106109	0.277128	0.44155	0.598981	0.749031	0.891335	1.02556	1.15146	1.26882	1.37755		0.59049	0.482228	0.526502	0.568842	0.608628	0.645423	0.678968	0.709165	0.736055	0.759777	0.78054	0.798598
1.77147	-0.00925443	0.181052	0.367306	0.549335	0.726944	0.899908	1.06798	1.23089	1.38834	1.54005	1.6857		1.77147	0.497686	0.54514	0.590808	0.633981	0.674134	0.710931	0.744212	0.773974	0.800328	0.823472	0.843658
5.31441	0.0123348	0.207443	0.399398	0.588168	0.773706	0.955951	1.13483	1.31023	1.48206	1.65017	1.81442		5.31441	0.503084	0.551676	0.598543	0.642945	0.684322	0.72231	0.756728	0.787552	0.814883	0.838914	0.859896
15.9432	0.0196458	0.216409	0.410343	0.601473	0.789814	0.975379	1.15817	1.33818	1.5154	1.68981	1.86136		15.9432	0.504911	0.553892	0.60117	0.645993	0.687791	0.72619	0.761	0.792191	0.81986	0.844199	0.865455
47.8297	0.0220959	0.219417	0.41402	0.605949	0.795244	0.981943	1.16608	1.34768	1.52677	1.70338	1.87752		47.8297	0.505524	0.554635	0.602051	0.647016	0.688956	0.727494	0.762435	0.79375	0.821534	0.845976	0.867326
143.489	0.022914	0.220421	0.415249	0.607446	0.797061	0.984141	1.16873	1.35087	1.53059	1.70795	1.88296		143.489	0.505728	0.554883	0.602346	0.647358	0.689346	0.727929	0.762915	0.794271	0.822093	0.84657	0.867951
430.467	0.0231869	0.220757	0.415659	0.607945	0.797668	0.984874	1.16961	1.35193	1.53187	1.70947	1.88478		430.467	0.505796	0.554966	0.602444	0.647472	0.689475	0.728074	0.763075	0.794445	0.82228	0.846768	0.86816
L0	0.1		thetaUO	8		thetaBO	150		netatheta	42.1875
Kb	20		thetaUC	18		thetaBC	8
Hill Plot = ln(po/1-po)													Po
Instance 3	thetaBO is T sensitive												Instance 3	thetaBO is T sensitive
dH	81000												dH	81000
dS	310												dS	310
	T(K)													T(K)
	293	295	297	299	301	303	305	307	309	311	313			293	295	297	299	301	303	305	307	309	311	313
Value of parameter	56.5599	70.8619	88.5111	110.228	136.873	169.474	209.253	257.66	316.412	387.536	473.418		Value of parameter	56.5599	70.8619	88.5111	110.228	136.873	169.474	209.253	257.66	316.412	387.536	473.418
Ca conc													Ca conc
1e-05	-3.11219	-3.11183	-3.11139	-3.11085	-3.11019	-3.10938	-3.10839	-3.10718	-3.10573	-3.10396	-3.10184		1e-05	0.0426072	0.0426217	0.0426397	0.0426618	0.042689	0.0427221	0.0427626	0.0428119	0.0428717	0.0429441	0.0430315
3e-05	-3.10955	-3.10848	-3.10717	-3.10555	-3.10357	-3.10115	-3.09821	-3.09464	-3.09033	-3.08513	-3.07889		3e-05	0.0427151	0.0427588	0.0428126	0.0428789	0.0429603	0.0430598	0.0431812	0.0433288	0.043508	0.0437248	0.0439864
9e-05	-3.10167	-3.0985	-3.0946	-3.08982	-3.08398	-3.07689	-3.06831	-3.05796	-3.04554	-3.03071	-3.0131		9e-05	0.0430385	0.0431693	0.0433307	0.0435293	0.0437728	0.0440705	0.0444336	0.0448751	0.0454103	0.0460575	0.0468377
0.00027	-3.07845	-3.06919	-3.05788	-3.04415	-3.02755	-3.0076	-2.98379	-2.95556	-2.92234	-2.88354	-2.83862		0.00027	0.0440052	0.0443962	0.0448783	0.0454709	0.0461969	0.0470837	0.0481635	0.0494742	0.0510602	0.0529731	0.0552727
0.00081	-3.01225	-2.9866	-2.95582	-2.91921	-2.87604	-2.82565	-2.7674	-2.70082	-2.62555	-2.54141	-2.44842		0.00081	0.0468754	0.0480349	0.049462	0.0512121	0.0533506	0.055954	0.0591112	0.062925	0.0675123	0.073006	0.0795539
0.00243	-2.83953	-2.77687	-2.70459	-2.62228	-2.52975	-2.42707	-2.31457	-2.19282	-2.06255	-1.92465	-1.78008		0.00243	0.055225	0.0585869	0.0627028	0.0677181	0.0737989	0.0811317	0.0899233	0.100398	0.112791	0.127344	0.144293
0.00729	-2.46787	-2.34711	-2.21576	-2.07473	-1.92511	-1.76808	-1.60485	-1.43656	-1.2643	-1.08904	-0.911623		0.00729	0.0781415	0.0872954	0.0983442	0.111578	0.127293	0.145781	0.167305	0.192078	0.220234	0.2518	0.286668
0.02187	-1.88202	-1.70717	-1.52654	-1.34144	-1.15303	-0.962322	-0.770169	-0.577288	-0.384267	-0.191585	0.000376197		0.02187	0.132157	0.153531	0.1785	0.207273	0.239936	0.276413	0.316443	0.359557	0.405098	0.45225	0.500094
0.06561	-1.24303	-1.03743	-0.83096	-0.624317	-0.418068	-0.212658	-0.00843644	0.194328	0.395431	0.594717	0.792074		0.06561	0.223909	0.261645	0.303442	0.3488	0.396979	0.447035	0.497891	0.54843	0.597589	0.644447	0.688276
0.19683	-0.763495	-0.545088	-0.328266	-0.113278	0.0996968	0.310525	0.519115	0.725403	0.929353	1.13094	1.33017		0.19683	0.317888	0.367005	0.418662	0.471711	0.524904	0.577013	0.626941	0.673796	0.716944	0.756013	0.790868
0.59049	-0.509211	-0.28617	-0.0656643	0.152259	0.367574	0.580272	0.79036	0.997851	1.20277	1.40514	1.60499		0.59049	0.375379	0.428942	0.48359	0.537991	0.590873	0.64113	0.687909	0.730636	0.769017	0.802998	0.832715
1.77147	-0.404313	-0.179684	0.0420778	0.260997	0.477104	0.690433	0.901025	1.10892	1.31416	1.51679	1.71686		1.77147	0.400276	0.455199	0.510518	0.564881	0.617064	0.666063	0.71116	0.751928	0.788209	0.820066	0.847724
5.31441	-0.366344	-0.141181	0.0810036	0.300257	0.516629	0.730169	0.94093	1.14896	1.35431	1.55703	1.75716		5.31441	0.409425	0.464763	0.52024	0.574505	0.626359	0.674842	0.719287	0.759321	0.794833	0.825926	0.852854
15.9432	-0.353314	-0.127972	0.0943534	0.313718	0.530179	0.74379	0.954606	1.16268	1.36807	1.57081	1.77097		15.9432	0.412579	0.468051	0.523571	0.577793	0.629525	0.677824	0.722041	0.76182	0.797068	0.8279	0.854579
47.8297	-0.348928	-0.123526	0.0988466	0.318249	0.534739	0.748373	0.959209	1.1673	1.3727	1.57545	1.77562		47.8297	0.413642	0.469158	0.524692	0.578897	0.630588	0.678824	0.722963	0.762656	0.797815	0.82856	0.855155
143.489	-0.347461	-0.122039	0.100349	0.319764	0.536263	0.749906	0.960748	1.16884	1.37424	1.577	1.77717		143.489	0.413998	0.469528	0.525066	0.579267	0.630943	0.679158	0.723271	0.762936	0.798065	0.82878	0.855348
430.467	-0.346971	-0.121542	0.100851	0.320269	0.536772	0.750417	0.961261	1.16936	1.37476	1.57752	1.77769		430.467	0.414117	0.469652	0.525191	0.57939	0.631061	0.67927	0.723374	0.763029	0.798148	0.828853	0.855412
L0	0.1		thetaUO	8		thetaBO	150		netatheta	42.1875
Kb	20		thetaUC	18		thetaBC	8
Hill Plot = ln(po/1-po)													Po
Instance 5	thetaUC is T sensitive												Instance 5	thetaUC is T senstive
dH	-71000												dH	-71000
dS	-220												dS	-220
	T(K)													T(K)
	293	295	297	299	301	303	305	307	309	311	313			293	295	297	299	301	303	305	307	309	311	313
Value of parameter	14.6542	12.0267	9.89655	8.16499	6.75362	5.60024	4.65524	3.87904	3.2399	2.71234	2.27585		Value of parameter	14.6542	12.0267	9.89655	8.16499	6.75362	5.60024	4.65524	3.87904	3.2399	2.71234	2.27585
Ca conc													Ca conc
1e-05	-2.90424	-2.70666	-2.51175	-2.31945	-2.12972	-1.9425	-1.75774	-1.5754	-1.39544	-1.2178	-1.04246		1e-05	0.0519445	0.0625815	0.0750386	0.0895248	0.106242	0.125374	0.147074	0.171448	0.198541	0.228323	0.260676
3e-05	-2.89701	-2.69948	-2.50463	-2.3124	-2.12275	-1.93562	-1.75098	-1.56878	-1.38898	-1.21154	-1.03642		3e-05	0.0523015	0.063004	0.0755344	0.0901013	0.106906	0.12613	0.147923	0.17239	0.199571	0.229429	0.261842
9e-05	-2.87566	-2.67827	-2.48359	-2.29157	-2.10216	-1.91533	-1.73103	-1.54924	-1.36993	-1.19306	-1.01861		9e-05	0.05337	0.0642676	0.0770165	0.0918237	0.108887	0.128384	0.150455	0.175195	0.202631	0.232712	0.265298
0.00027	-2.81437	-2.61741	-2.42324	-2.23183	-2.04315	-1.85719	-1.67393	-1.49336	-1.31549	-1.14031	-0.967857		0.00027	0.0565527	0.0680264	0.0814176	0.0969284	0.114746	0.135031	0.157901	0.183418	0.21157	0.242263	0.275308
0.00081	-2.65143	-2.45574	-2.2631	-2.0735	-1.88699	-1.70359	-1.52335	-1.34635	-1.17266	-1.00239	-0.835637		0.00081	0.0659009	0.0790196	0.0942258	0.111699	0.131589	0.153998	0.178968	0.206468	0.236374	0.268472	0.302454
0.00243	-2.2863	-2.09433	-1.90611	-1.72176	-1.54144	-1.36532	-1.19359	-1.02649	-0.864261	-0.707157	-0.55546		0.00243	0.0922641	0.109649	0.129419	0.151645	0.176326	0.203378	0.232617	0.263764	0.29645	0.330227	0.364599
0.00729	-1.66704	-1.48542	-1.30933	-1.13911	-0.975125	-0.817735	-0.667313	-0.524216	-0.388766	-0.261242	-0.141857		0.00729	0.158819	0.18461	0.212599	0.242483	0.27386	0.306245	0.339099	0.371867	0.404014	0.435058	0.464595
0.02187	-0.902662	-0.746311	-0.598742	-0.460327	-0.331357	-0.212017	-0.102367	-0.00233947	0.0882693	0.169786	0.242648		0.02187	0.288504	0.321626	0.354632	0.386908	0.41791	0.447193	0.474431	0.499415	0.522053	0.542345	0.560366
0.06561	-0.205334	-0.0949978	0.00434701	0.0930745	0.171712	0.24091	0.301407	0.353991	0.399466	0.438625	0.472226		0.06561	0.448846	0.476268	0.501087	0.523252	0.542823	0.559938	0.574786	0.587585	0.598559	0.607931	0.615911
0.19683	0.259993	0.318616	0.368801	0.411537	0.447775	0.478395	0.504202	0.525909	0.544143	0.559449	0.572292		0.19683	0.564635	0.578987	0.591169	0.601456	0.61011	0.617369	0.623446	0.628528	0.632776	0.636325	0.639292
0.59049	0.488922	0.513293	0.533496	0.550225	0.564071	0.57553	0.585017	0.592878	0.599397	0.60481	0.609311		0.59049	0.619852	0.625578	0.630298	0.634188	0.637394	0.640038	0.642221	0.644025	0.645518	0.646756	0.647784
1.77147	0.579703	0.588557	0.595792	0.601713	0.606565	0.610547	0.613822	0.61652	0.618747	0.620589	0.622115		1.77147	0.640999	0.643034	0.644693	0.646048	0.647157	0.648066	0.648812	0.649427	0.649933	0.650352	0.6507
5.31441	0.612023	0.615065	0.617539	0.619554	0.621199	0.622546	0.62365	0.624559	0.625307	0.625926	0.626437		5.31441	0.648402	0.649095	0.649659	0.650117	0.650491	0.650797	0.651048	0.651255	0.651425	0.651565	0.651681
15.9432	0.623048	0.624072	0.624904	0.62558	0.626132	0.626583	0.626953	0.627256	0.627507	0.627713	0.627884		15.9432	0.650911	0.651144	0.651333	0.651487	0.651612	0.651714	0.651798	0.651867	0.651924	0.651971	0.65201
47.8297	0.626751	0.627094	0.627372	0.627598	0.627782	0.627933	0.628056	0.628158	0.628241	0.62831	0.628367		47.8297	0.651752	0.65183	0.651893	0.651945	0.651986	0.652021	0.652049	0.652072	0.652091	0.652106	0.652119
143.489	0.627989	0.628104	0.628196	0.628272	0.628333	0.628383	0.628424	0.628458	0.628486	0.628509	0.628528		143.489	0.652033	0.652059	0.65208	0.652097	0.652111	0.652123	0.652132	0.65214	0.652146	0.652151	0.652156
430.467	0.628402	0.62844	0.628471	0.628496	0.628517	0.628534	0.628547	0.628559	0.628568	0.628575	0.628582		430.467	0.652127	0.652136	0.652143	0.652148	0.652153	0.652157	0.65216	0.652163	0.652165	0.652166	0.652168
L0	0.1		thetaUO	8		thetaBO	150		netatheta	42.1875
Kb	20		thetaUC	18		thetaBC	8
Hill Plot = ln(po/1-po)													Po
Instance 6	thetaUO is T sensitive												Instance 6	thetaUO is T senstive
dH	80000												dH	80000
dS	300												dS	300
	T(K)													T(K)
	293	295	297	299	301	303	305	307	309	311	313			293	295	297	299	301	303	305	307	309	311	313
Value of parameter	25.6109	31.9978	39.8578	49.5028	61.305	75.707	93.2339	114.507	140.261	171.36	208.819		Value of parameter	25.6109	31.9978	39.8578	49.5028	61.305	75.707	93.2339	114.507	140.261	171.36	208.819
Ca conc													Ca conc
1e-05	-1.94886	-1.72644	-1.50698	-1.29041	-1.0767	-0.86578	-0.657612	-0.452144	-0.249324	-0.0491043	0.148564		1e-05	0.124678	0.151043	0.181387	0.215783	0.254132	0.296133	0.341276	0.388851	0.43799	0.487726	0.537073
3e-05	-1.9467	-1.72475	-1.50565	-1.28938	-1.0759	-0.865165	-0.657147	-0.451798	-0.249074	-0.0489321	0.148673		3e-05	0.124914	0.151261	0.181584	0.215958	0.254284	0.296261	0.341381	0.388933	0.438051	0.487769	0.5371
9e-05	-1.94025	-1.71969	-1.50169	-1.28629	-1.0735	-0.863326	-0.655753	-0.450761	-0.248326	-0.0484158	0.149001		9e-05	0.12562	0.151912	0.182174	0.216482	0.254738	0.296645	0.341694	0.38918	0.438236	0.487898	0.537182
0.00027	-1.9212	-1.70469	-1.48992	-1.27709	-1.06637	-0.857842	-0.651592	-0.447665	-0.246088	-0.0468719	0.149983		0.00027	0.127728	0.153854	0.183934	0.218045	0.256095	0.29779	0.342631	0.389916	0.438787	0.488284	0.537426
0.00081	-1.86647	-1.66127	-1.45563	-1.25018	-1.0454	-0.841668	-0.63929	-0.438492	-0.239447	-0.0422836	0.152904		0.00081	0.133951	0.159592	0.189136	0.222669	0.26011	0.301184	0.345407	0.3921	0.440423	0.489431	0.538152
0.00243	-1.72083	-1.54341	-1.36104	-1.17492	-0.986108	-0.795523	-0.603931	-0.411967	-0.22015	-0.0288986	0.161454		0.00243	0.151765	0.17604	0.204071	0.235967	0.271682	0.310984	0.353445	0.39844	0.445184	0.492776	0.540276
0.00729	-1.39542	-1.26921	-1.13301	-0.987827	-0.834797	-0.675102	-0.509908	-0.340317	-0.167337	0.00813711	0.185325		0.00729	0.198545	0.219392	0.243606	0.271342	0.302632	0.337355	0.375215	0.415732	0.458263	0.502034	0.546199
0.02187	-0.857317	-0.789643	-0.712195	-0.624688	-0.527083	-0.419596	-0.302679	-0.176992	-0.0433492	0.0973325	0.24409		0.02187	0.2979	0.312245	0.329114	0.348716	0.371197	0.396614	0.424903	0.455867	0.489164	0.524314	0.560721
0.06561	-0.247743	-0.219435	-0.185663	-0.145721	-0.0989223	-0.0446307	0.0176964	0.0884724	0.167949	0.256194	0.353082		0.06561	0.438379	0.44536	0.453717	0.463634	0.47529	0.488844	0.504424	0.522104	0.541889	0.5637	0.587365
0.19683	0.218998	0.229312	0.241859	0.257045	0.275318	0.297173	0.323142	0.353782	0.389661	0.431337	0.479335		0.19683	0.554532	0.557078	0.560172	0.56391	0.568398	0.573751	0.58009	0.587534	0.596201	0.606193	0.617591
0.59049	0.468573	0.47212	0.476469	0.48178	0.48824	0.496067	0.505511	0.516855	0.530418	0.546555	0.565652		0.59049	0.615046	0.615885	0.616914	0.618168	0.619692	0.621535	0.623754	0.626412	0.629581	0.633336	0.637759
1.77147	0.571845	0.57304	0.574509	0.576309	0.578507	0.581182	0.584429	0.588355	0.593087	0.598773	0.605578		1.77147	0.639189	0.639464	0.639803	0.640218	0.640724	0.641339	0.642086	0.642988	0.644073	0.645375	0.646931
5.31441	0.609266	0.609666	0.610158	0.610761	0.611499	0.612398	0.613492	0.614817	0.61642	0.618352	0.620673		5.31441	0.647773	0.647865	0.647977	0.648114	0.648283	0.648488	0.648737	0.649039	0.649404	0.649844	0.650372
15.9432	0.622112	0.622246	0.62241	0.622612	0.622858	0.623159	0.623525	0.623968	0.624505	0.625153	0.625934		15.9432	0.650699	0.650729	0.650766	0.650812	0.650868	0.650937	0.65102	0.651121	0.651243	0.65139	0.651567
47.8297	0.626438	0.626482	0.626537	0.626604	0.626686	0.626787	0.626909	0.627057	0.627236	0.627453	0.627714		47.8297	0.651681	0.651691	0.651704	0.651719	0.651738	0.651761	0.651788	0.651822	0.651863	0.651912	0.651971
143.489	0.627884	0.627899	0.627918	0.62794	0.627967	0.628001	0.628041	0.628091	0.628151	0.628223	0.62831		143.489	0.65201	0.652013	0.652017	0.652022	0.652028	0.652036	0.652045	0.652056	0.65207	0.652086	0.652106
430.467	0.628367	0.628372	0.628378	0.628386	0.628395	0.628406	0.62842	0.628436	0.628456	0.62848	0.628509		430.467	0.652119	0.65212	0.652122	0.652123	0.652125	0.652128	0.652131	0.652135	0.652139	0.652145	0.652151
